# Supplementary material for: Synthesis and Pharmacological In Vitro Investigations of Novel Shikonin Derivatives with a Special Focus on Cyclopropane Bearing Derivatives
Source: PubMed Central journal article supplement (PMC7967198; doi:10.3390/ijms22052774), 2021-03-09

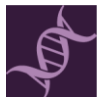

*Supplemental Material to:*

# Synthesis and pharmacological in-vitro investigations of novel shikonin derivatives with a special focus on cyclopropane bearing derivatives

Nadine Kretschmer <sup>1</sup>, Antje Hufner <sup>2</sup>, Christin Durchschein <sup>1</sup>, Katrin Popodi <sup>1</sup>, Beate Rinner <sup>3</sup>, Birgit Lohberger <sup>4</sup>, Rudolf Bauer <sup>1\*</sup>

<sup>1</sup> Institute of Pharmaceutical Sciences, Department of Pharmacognosy, University of Graz, Beethovenstr. 8, 8010 Graz, Austria; nadine.kretschmer@uni-graz.at (N.K.); christin.durchschein@hotmail.com (C.D.); katrin.popodi@gmx.at (K.P.)

<sup>2</sup> Institute of Pharmaceutical Sciences, Department of Pharmaceutical Chemistry, University of Graz, Universitaetsplatz 1, 8010 Graz, Austria; antje.huefner@uni-graz.at (A.H.)

<sup>3</sup> Division of Biomedical Research, Medical University of Graz, Roseggerweg 48, 8036 Graz, Austria; beate.rinner@medunigraz.at (B.R.)

<sup>4</sup> Department of Orthopedics and Trauma, Medical University Graz, Auenbruggerplatz 5, 8036 Graz, Austria; birgit.lohberger@medunigraz.at (B.L.)

\* Correspondence: rudolf.bauer@uni-graz.at (R.B.)

**Content of supporting information file:**

|                                                                                                                                                                                                                                                |    |
|------------------------------------------------------------------------------------------------------------------------------------------------------------------------------------------------------------------------------------------------|----|
| 1. Results of XTT screening. ....                                                                                                                                                                                                              | 3  |
| 2. <sup>1</sup> H-NMR spectra (CDCl <sub>3</sub> , 400 MHz) of all shikonin derivatives synthesized for this study and <sup>13</sup> C-NMR spectra (100 MHz) or HMBC spectra of derivatives with yet unknown <sup>13</sup> C-NMR spectra ..... | 5  |
| 3. <sup>1</sup> H NMR spectra of precursor acids.....                                                                                                                                                                                          | 34 |

## 1. Results of XTT screening.

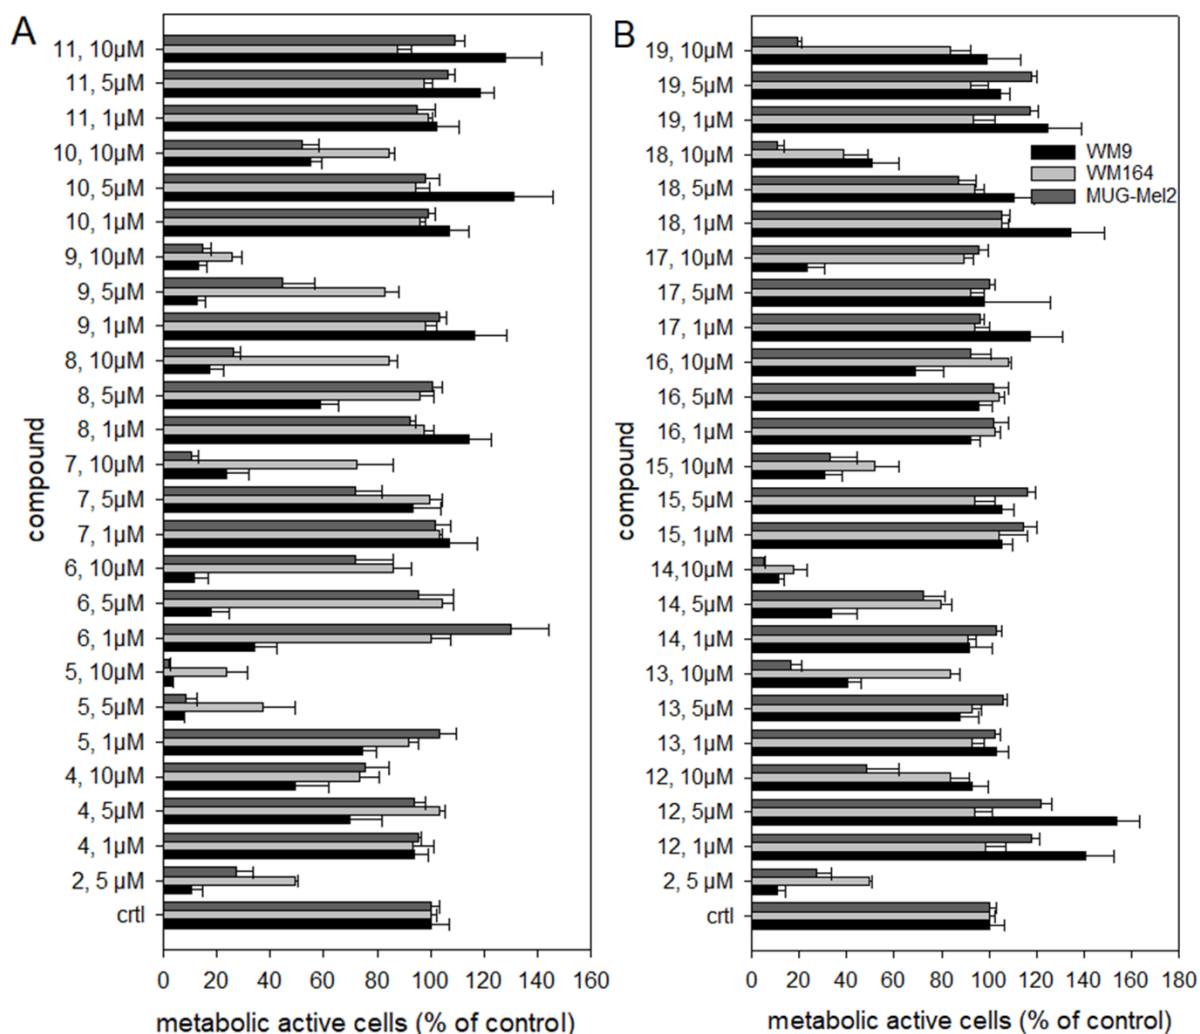

**Figure S1.** Results of compounds 4-11 (A) and to 12-19 (B) compared to 5.0 μM of 2. Vinblastine was used as positive control. At a concentration of 0.01 nM, it reduced the cell viability compared to control cells to: WM9 cells:  $23.8 \pm 1.5$  %, WM164 cells:  $59.4 \pm 4.4$  %, and MUG-Mel2 cells:  $65.0 \pm 6.9$  % ( $n = 6$ , mean  $\pm$  sem, 72h of treatment).

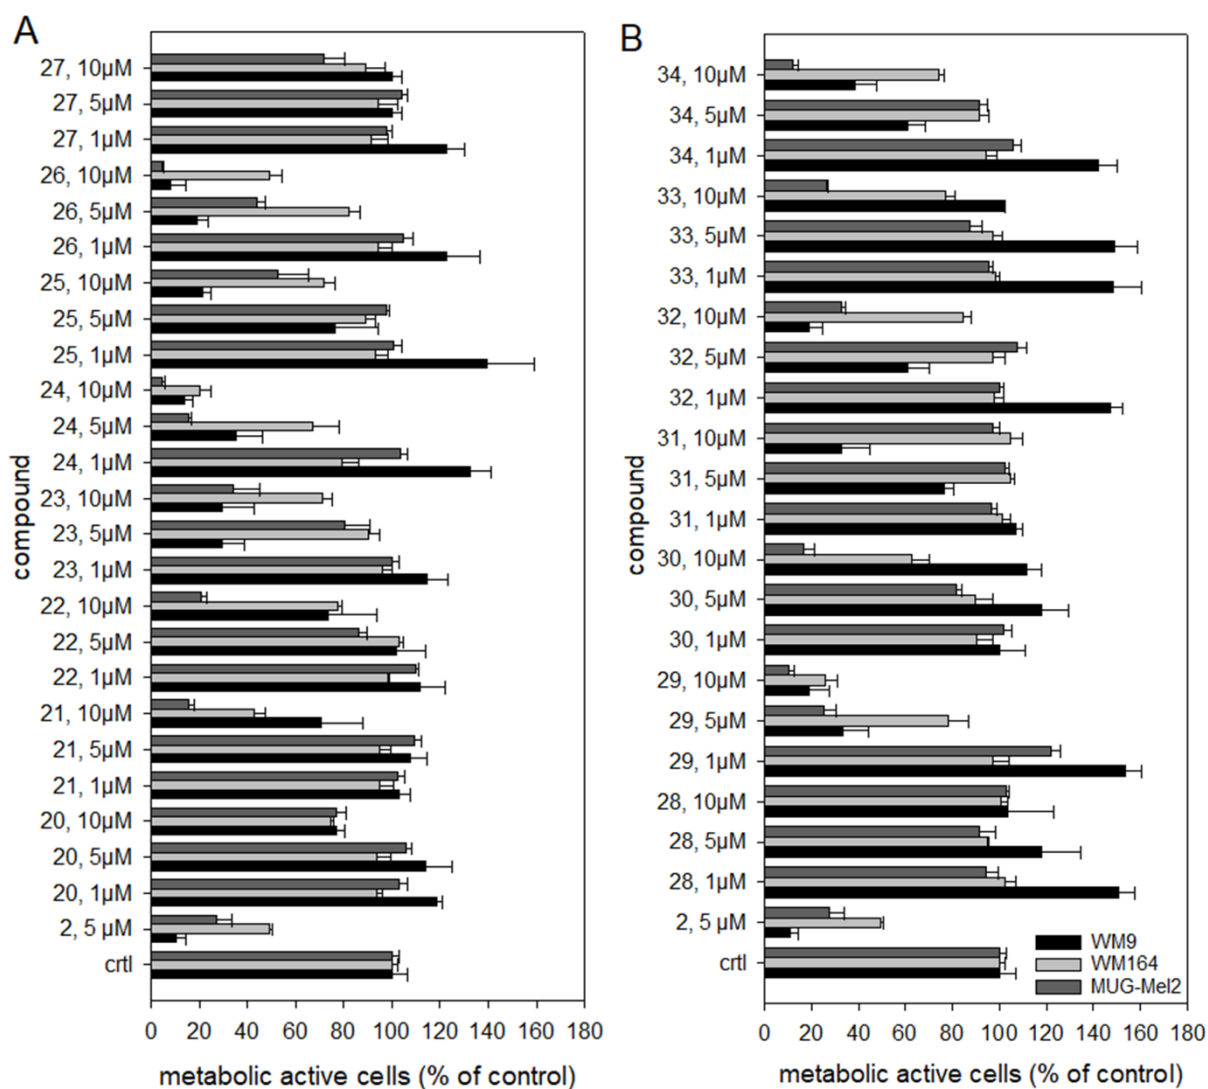

**Figure S2.** Results of compounds 20-27 (A) and 28-34 (B) compared to 5.0 μM of 2. Vinblastine was used as positive control. At a concentration of 0.01 nM, it reduced the cell viability compared to control cells to: WM9 cells: 23.8 ± 1.5 %, WM164 cells: 59.4 ± 4.4 %, and MUG-Mel2 cells: 65.0 ± 6.9 % (n = 6, mean ± sem, 72h of treatment).

2.  $^1\text{H-NMR}$  spectra ( $\text{CDCl}_3$ , 400 MHz) of all shikonin derivatives synthesized for this study and  $^{13}\text{C-NMR}$  spectra (100 MHz) or HMBC spectra of derivatives with yet unknown  $^{13}\text{C-NMR}$  spectra

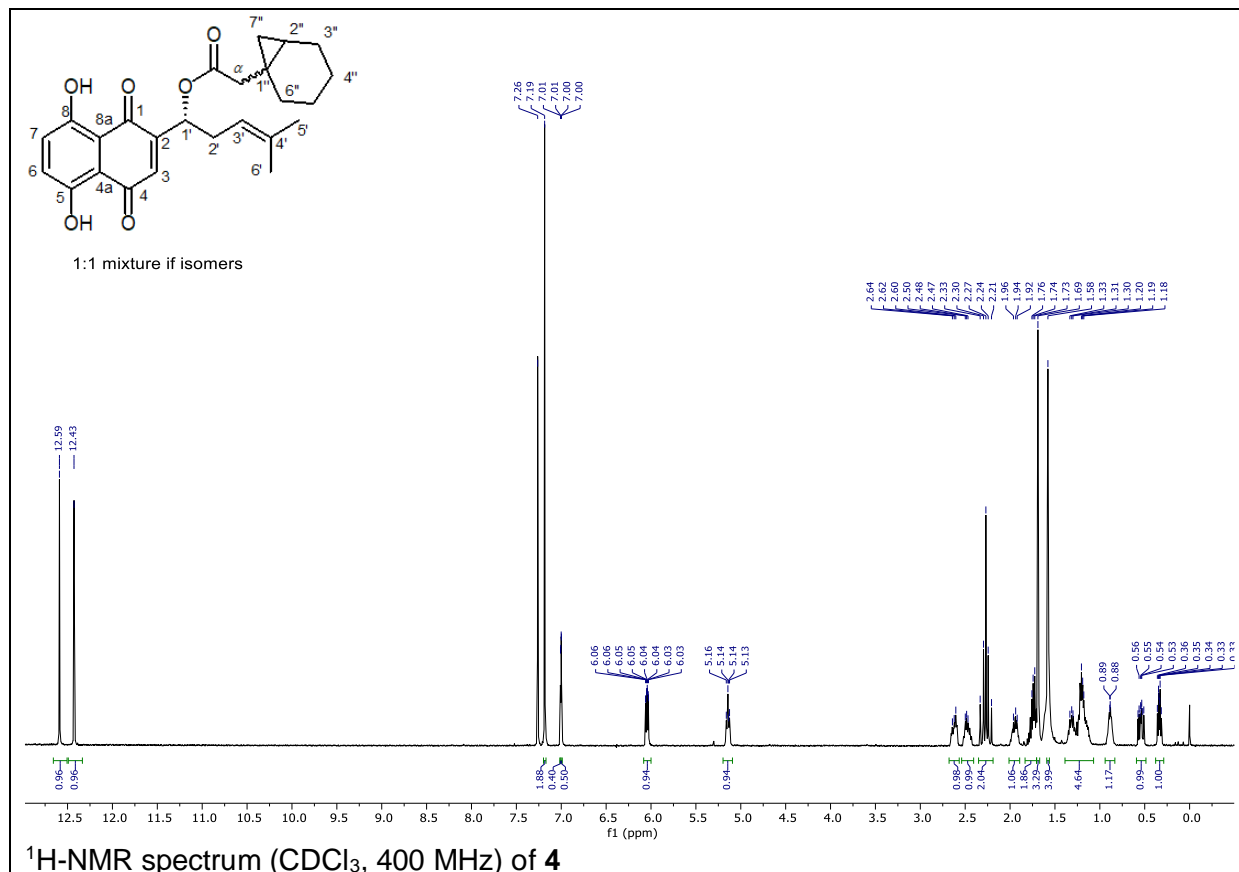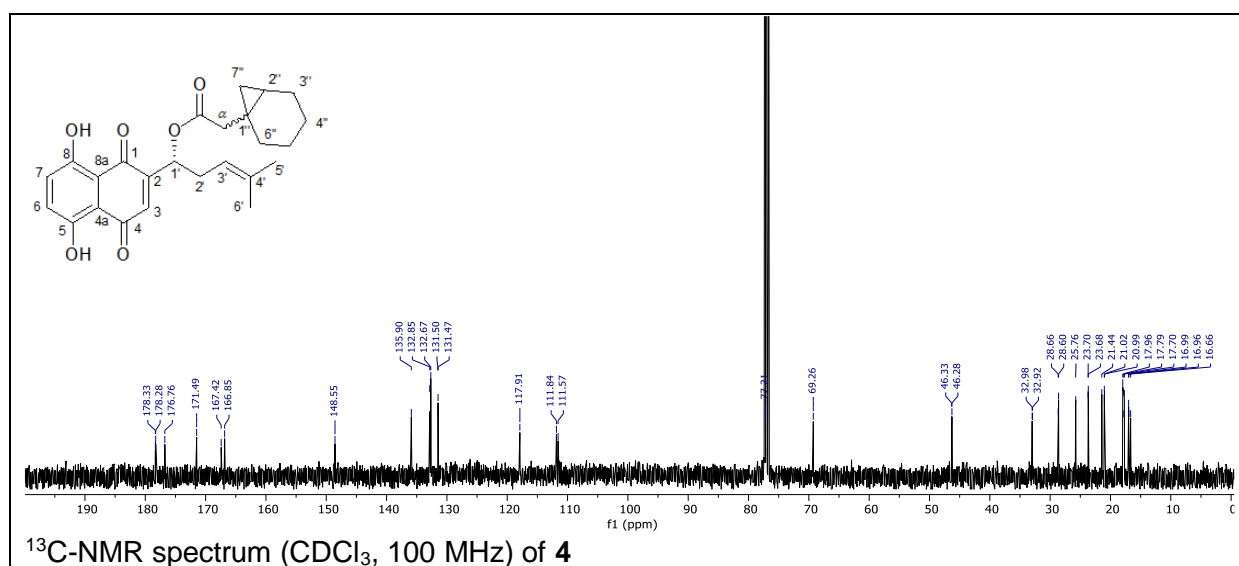

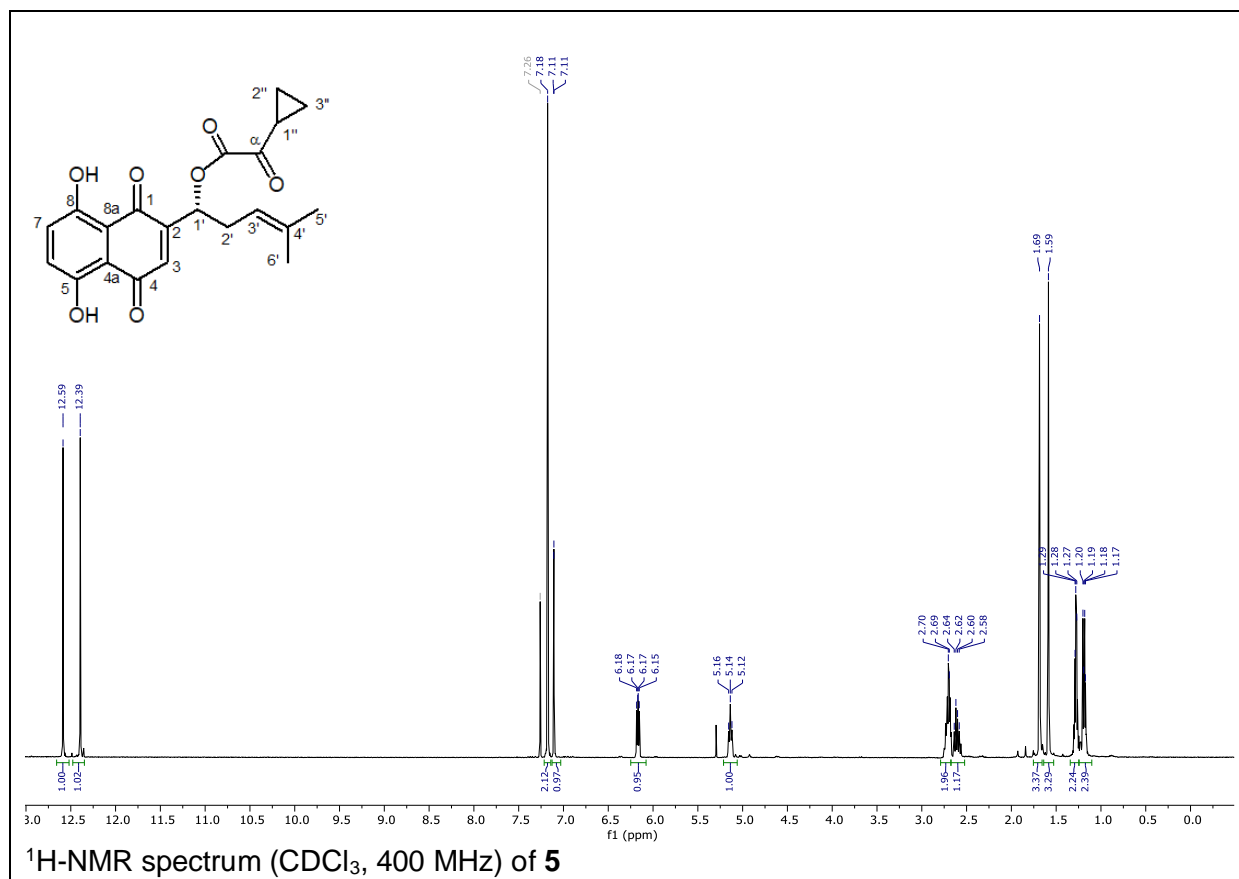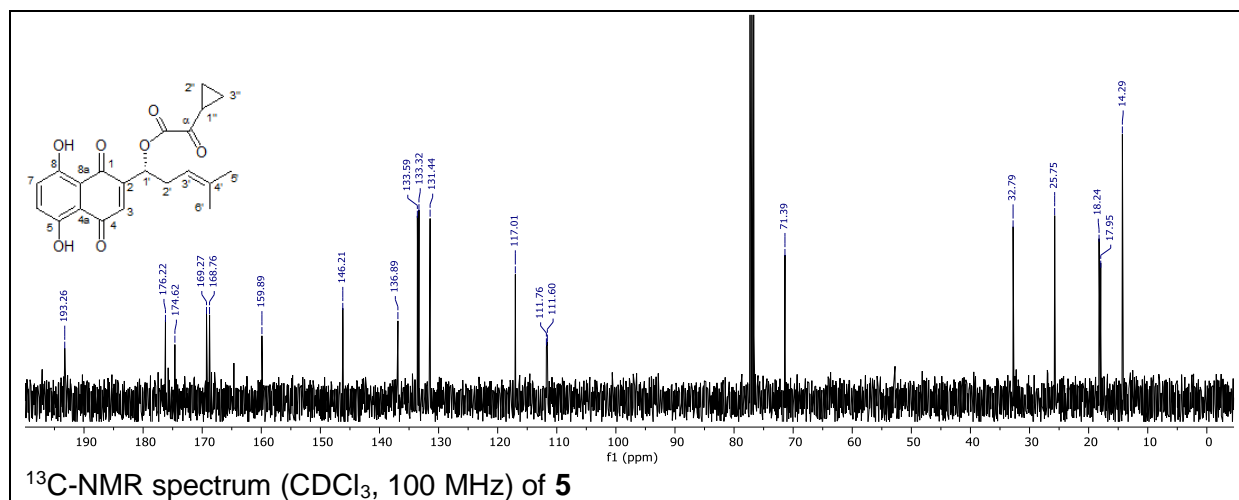

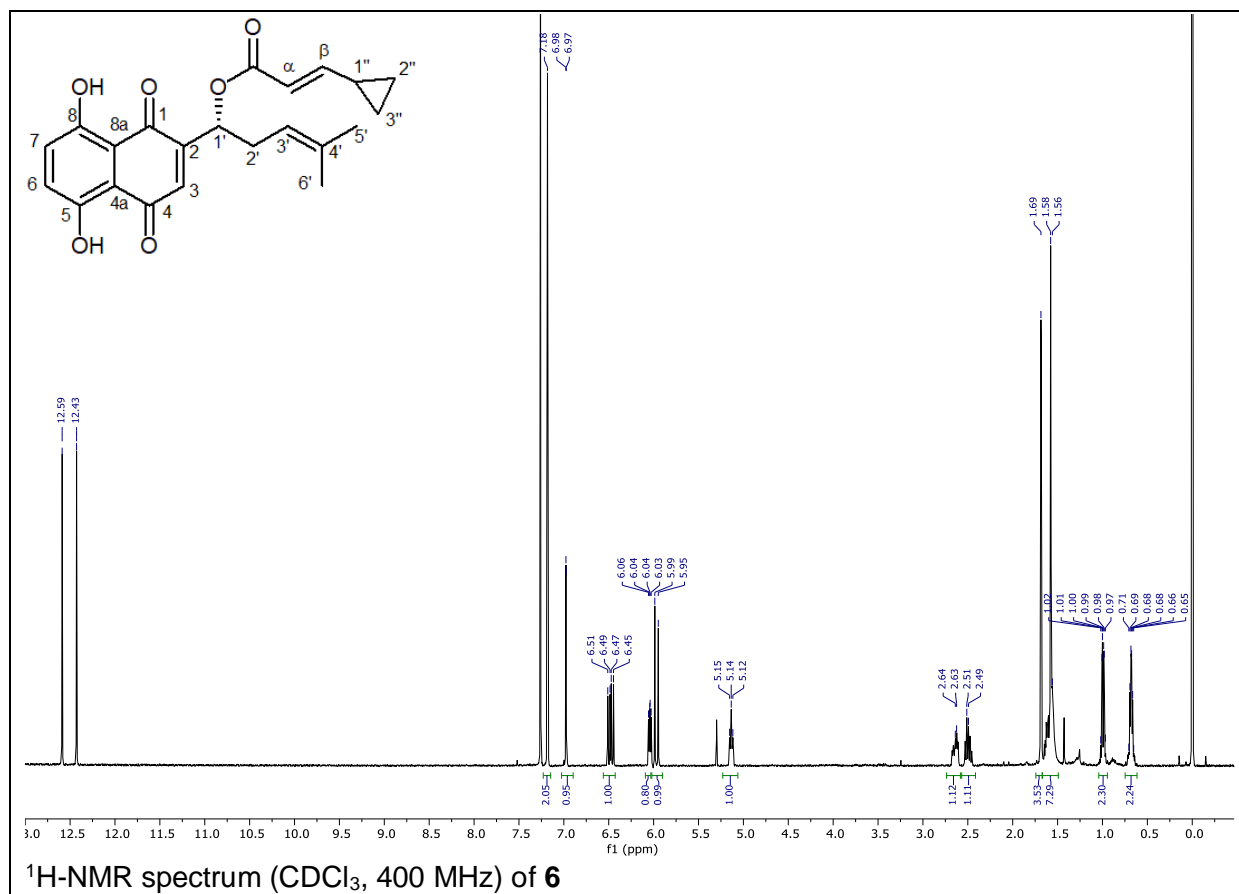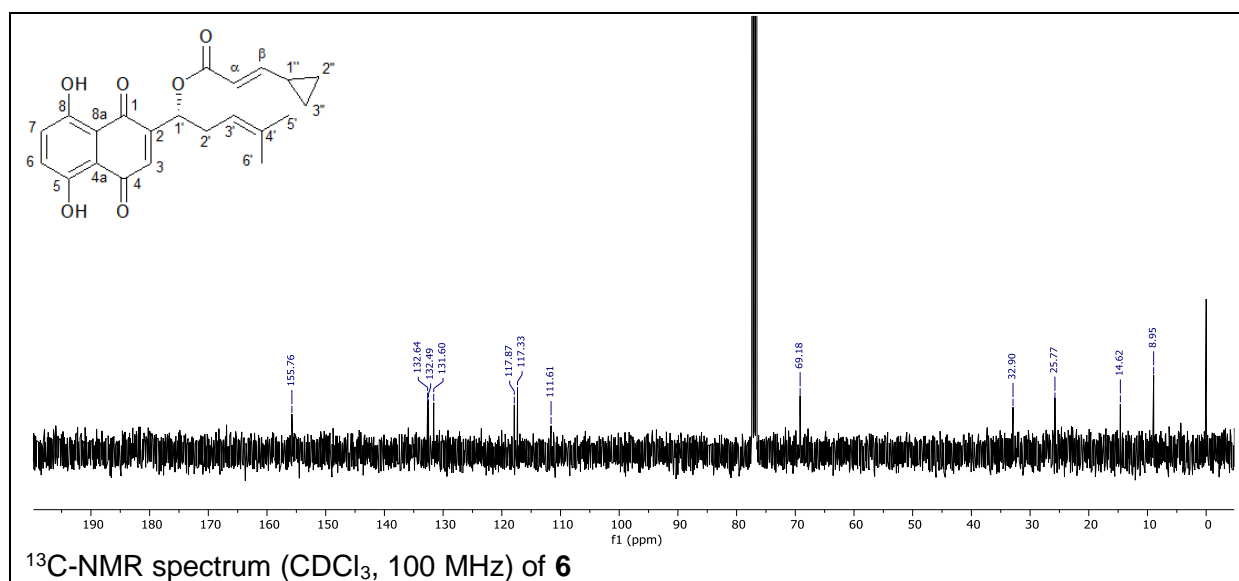

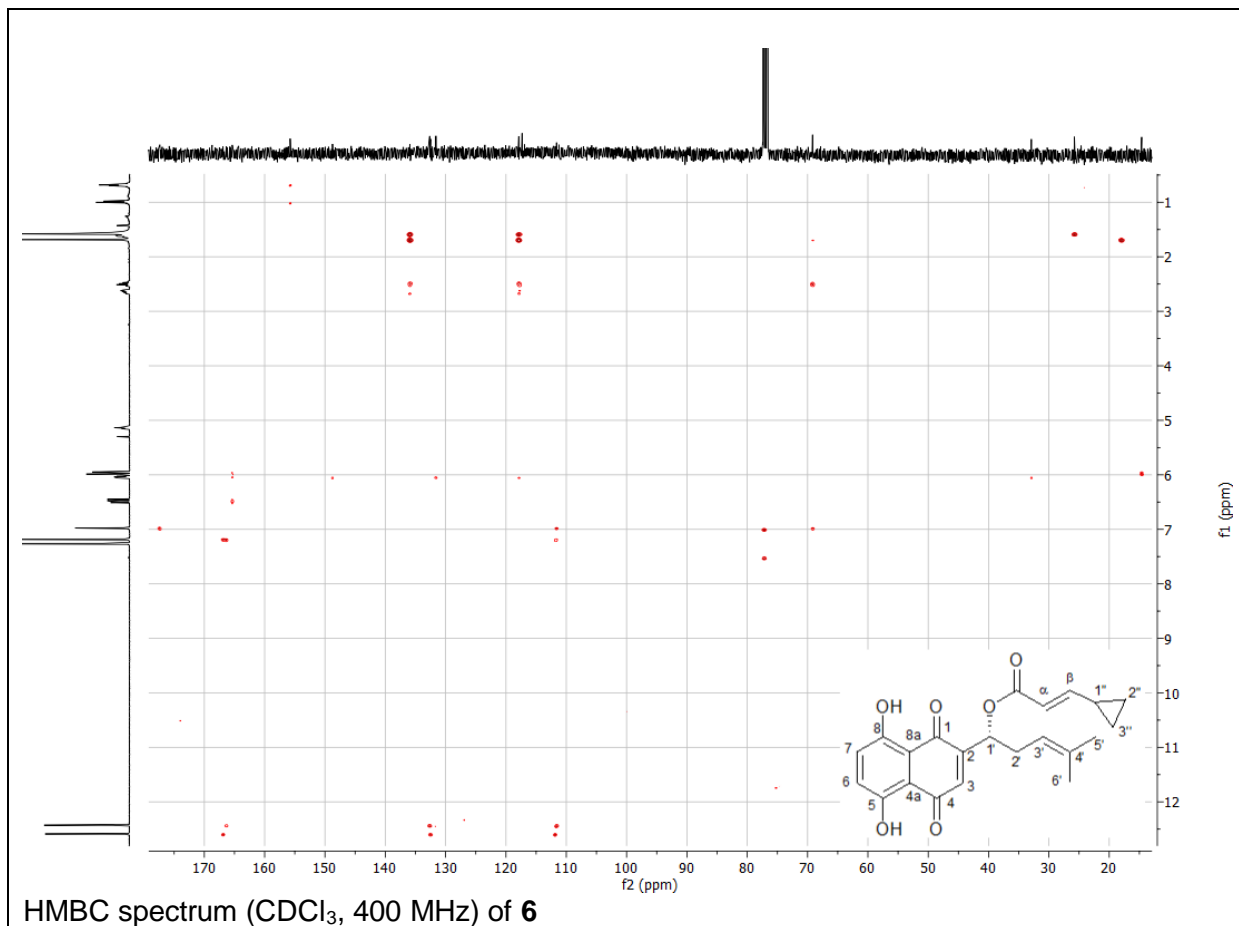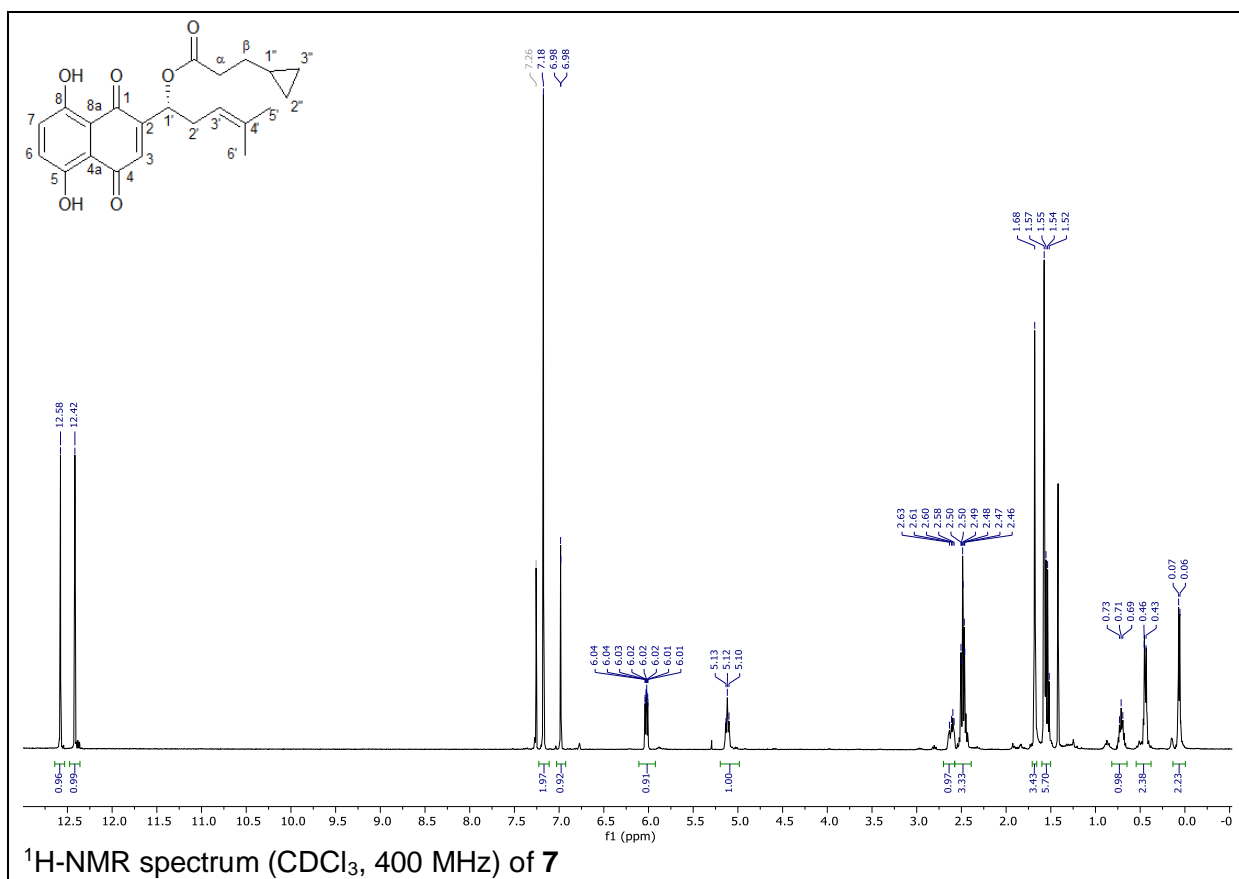



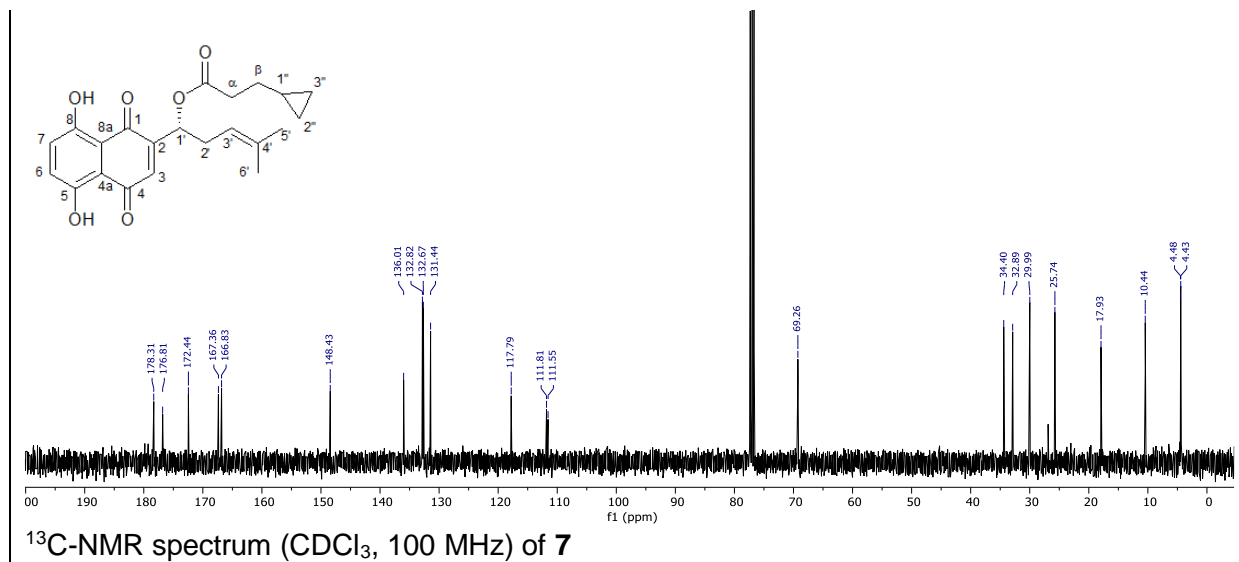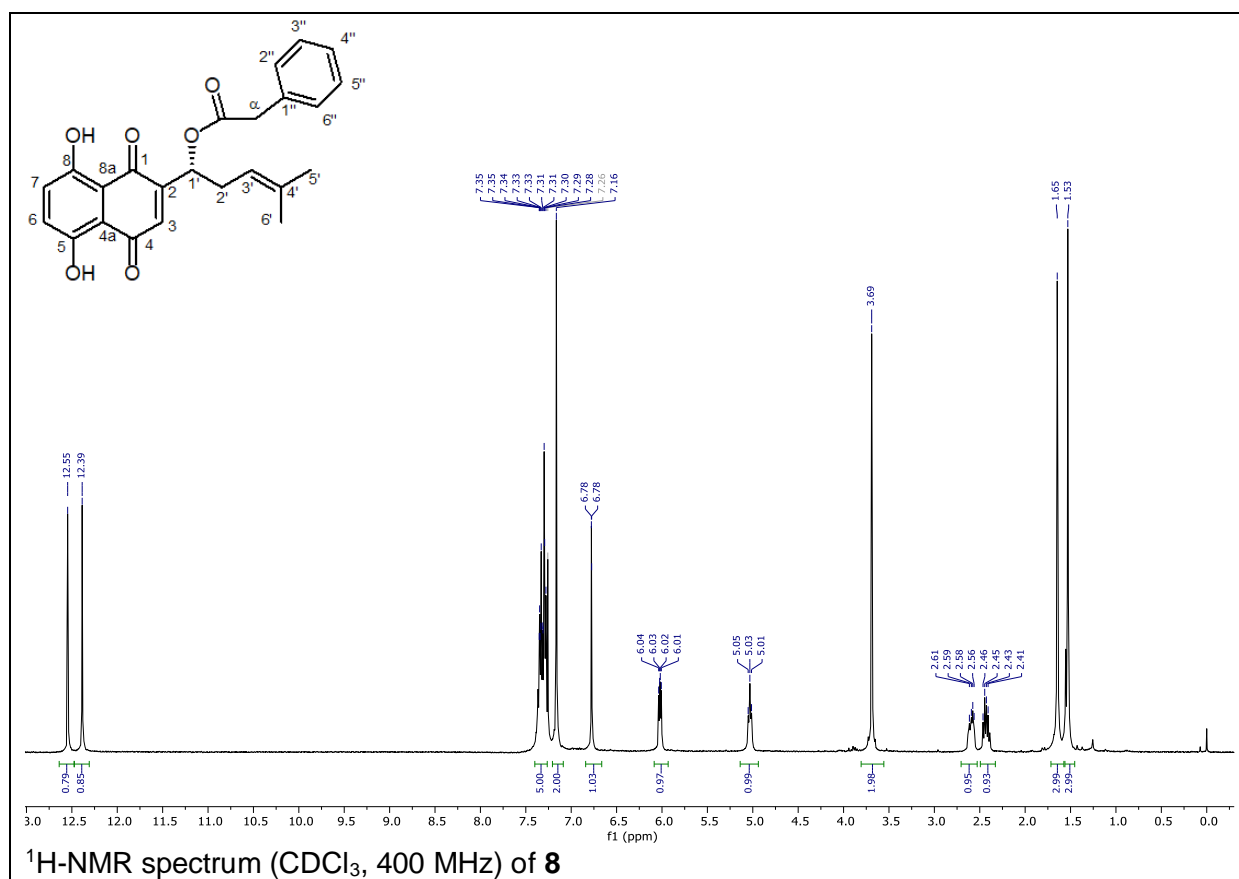

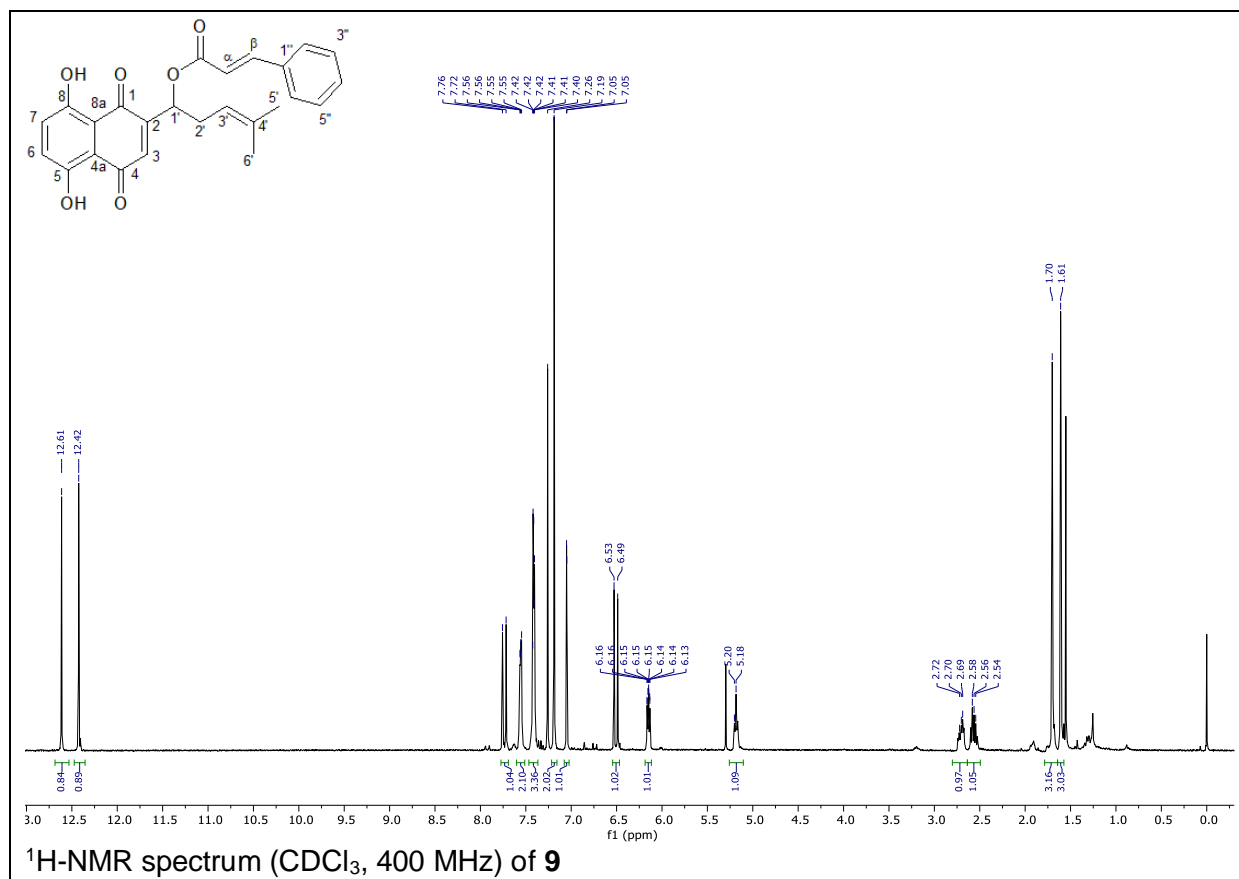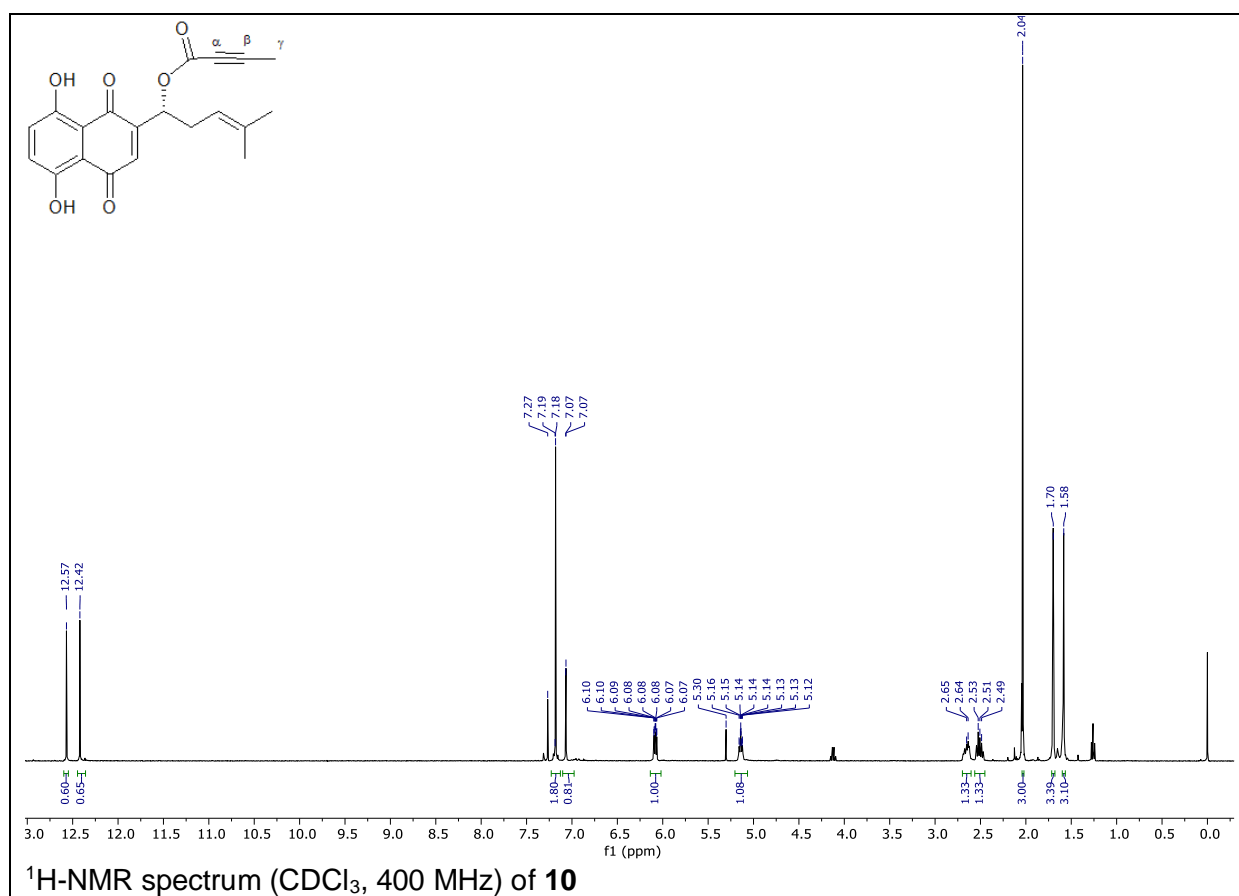

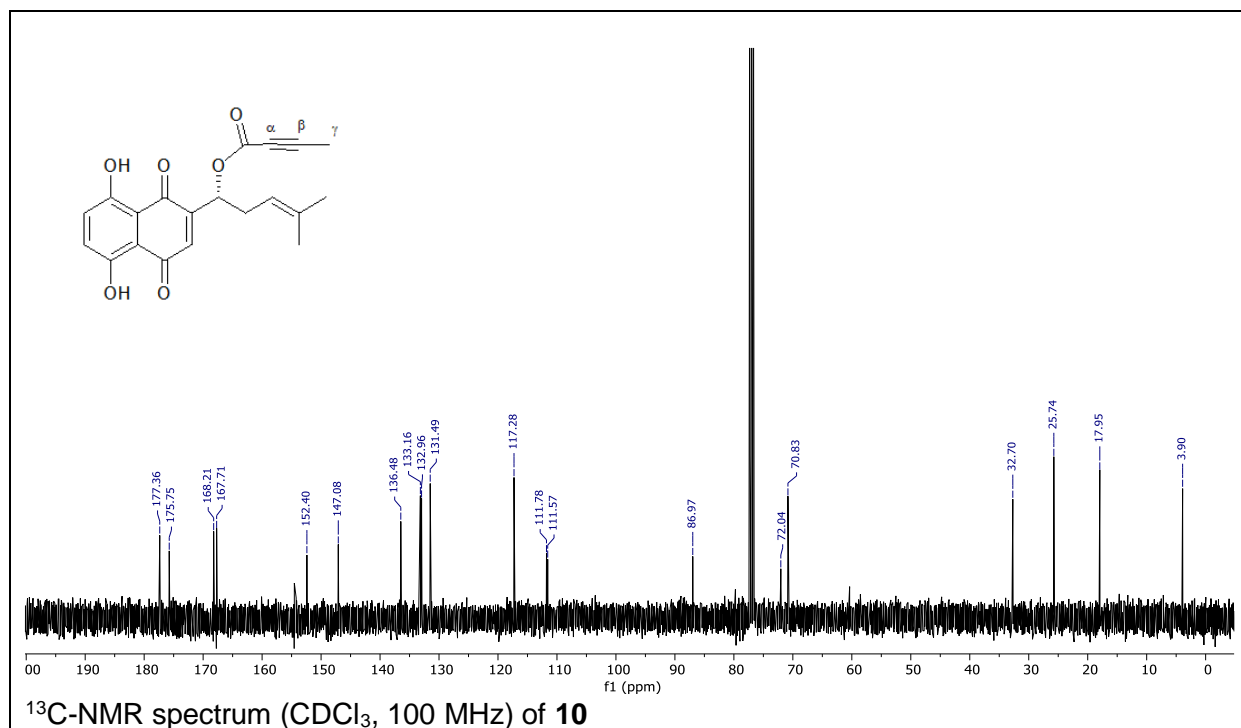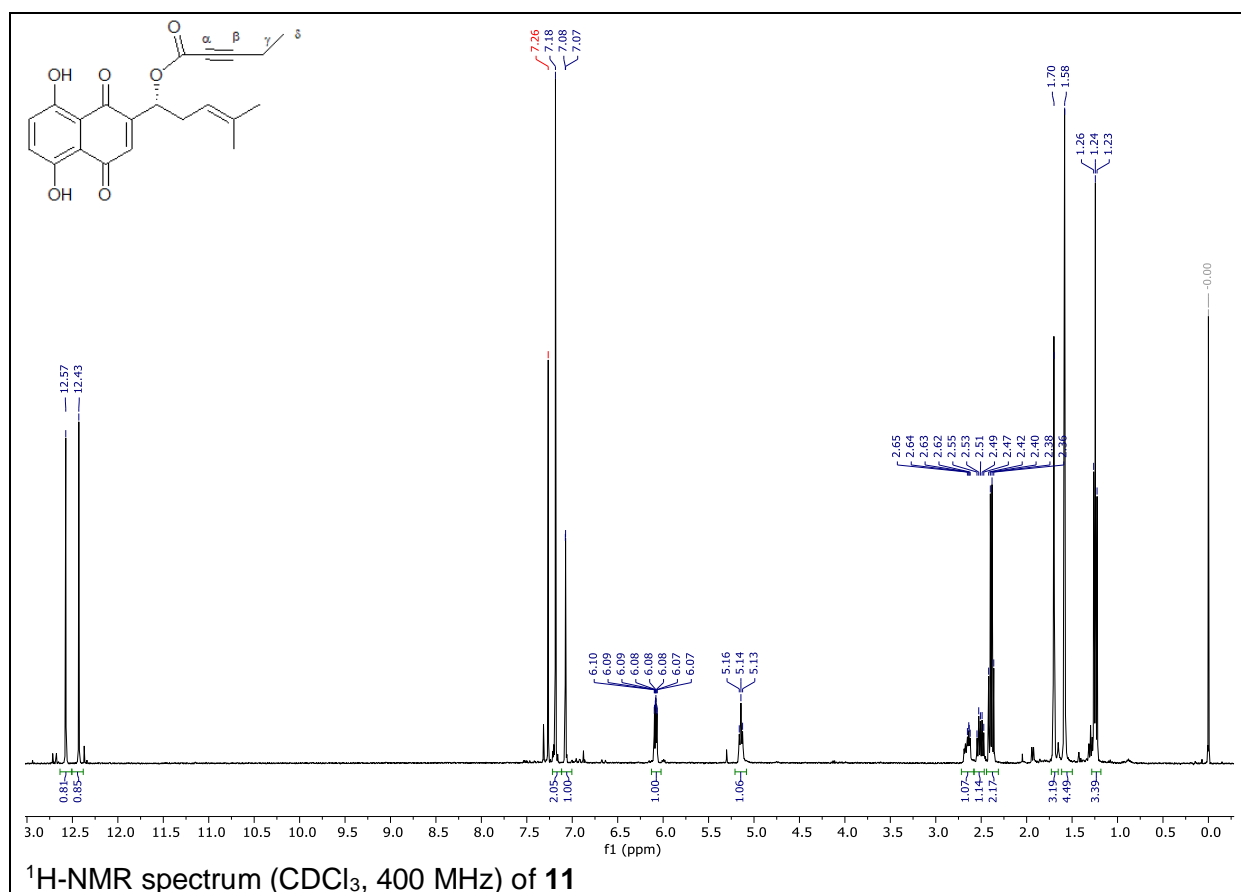

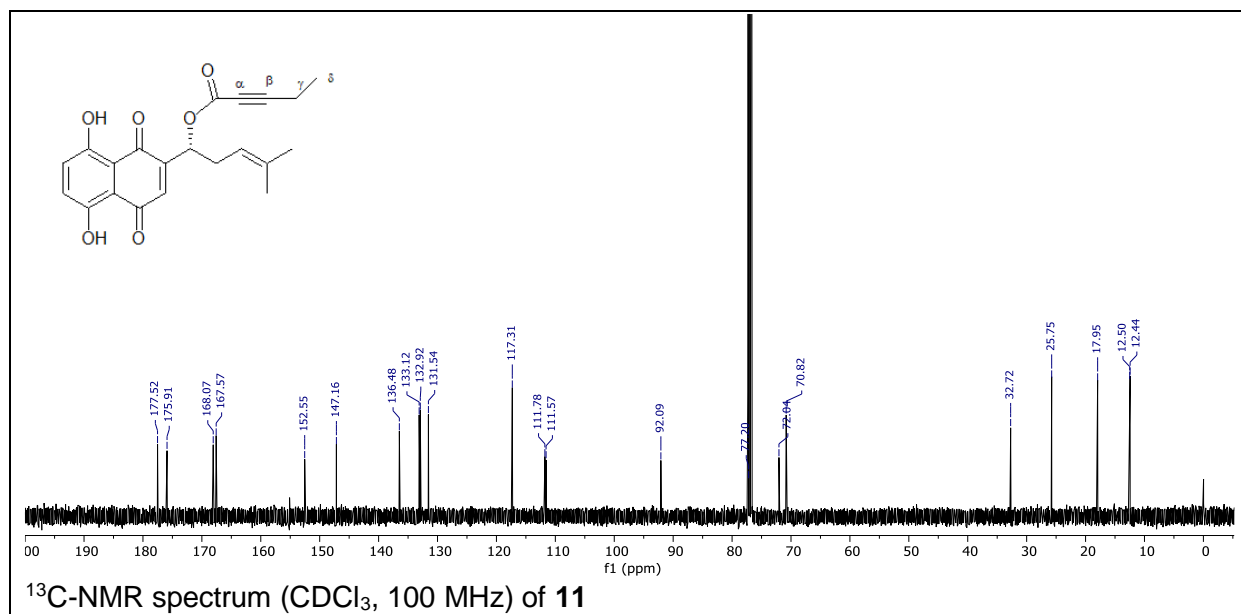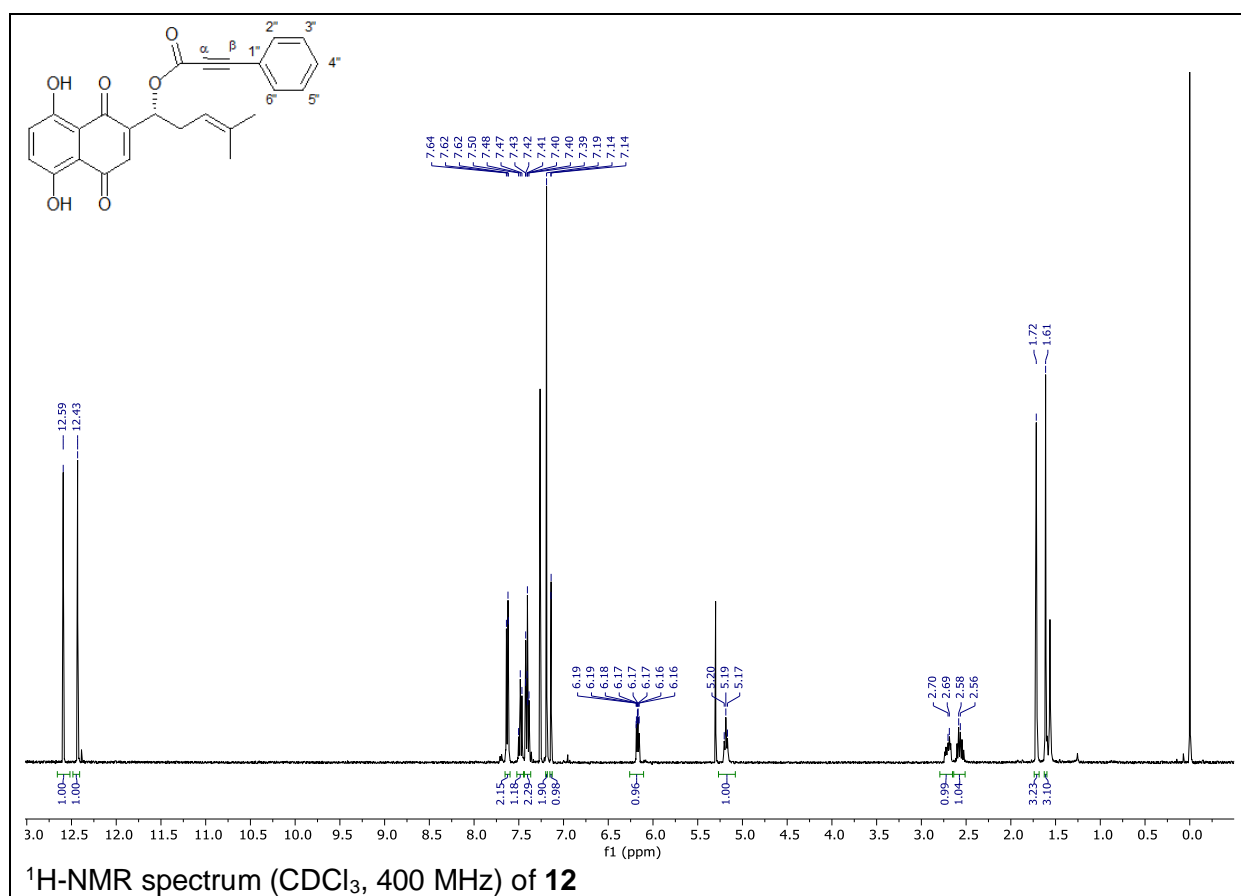

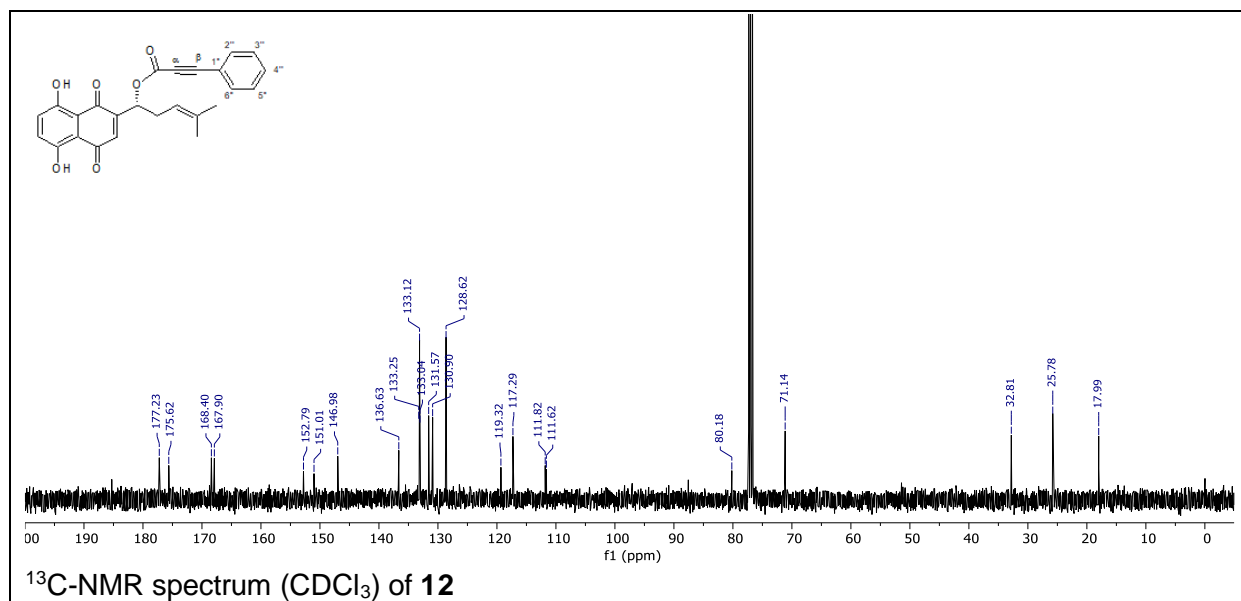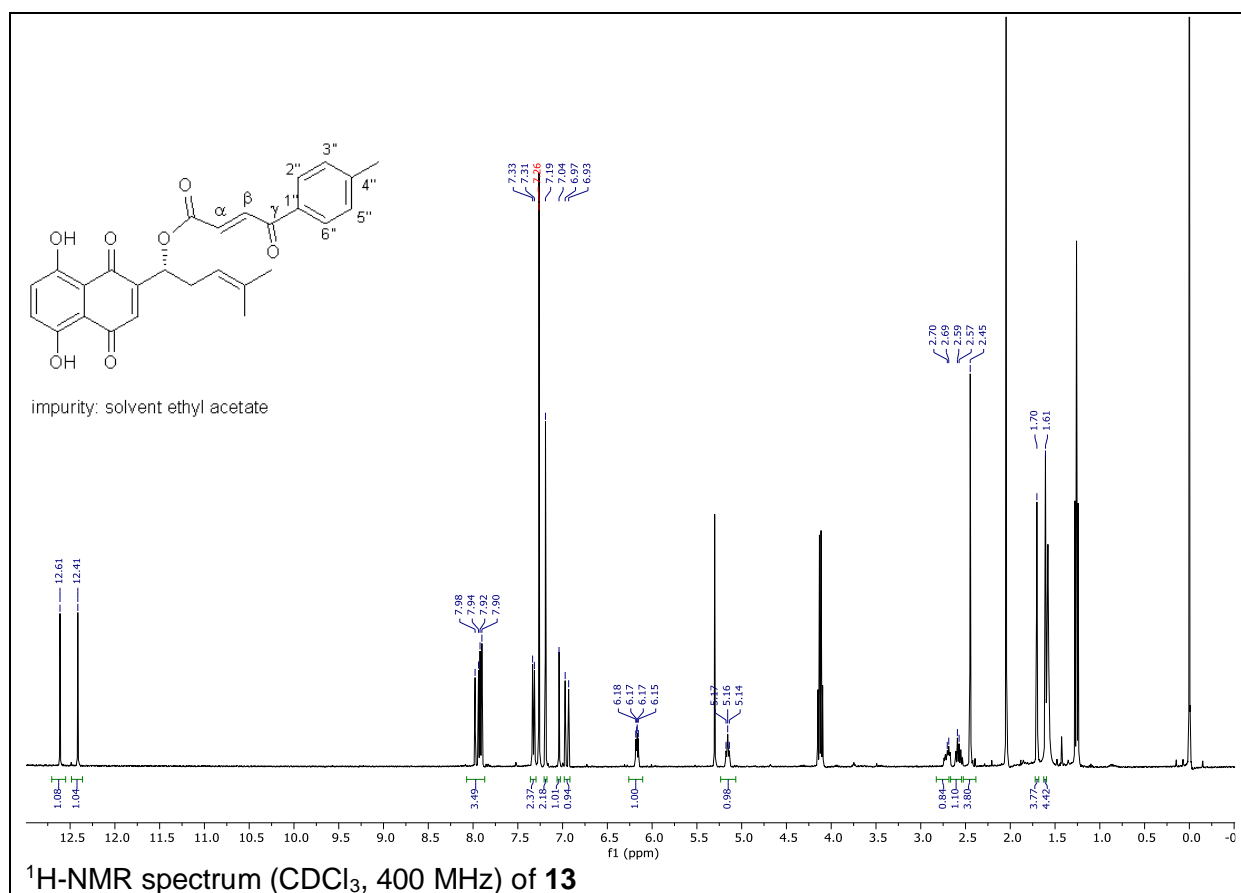

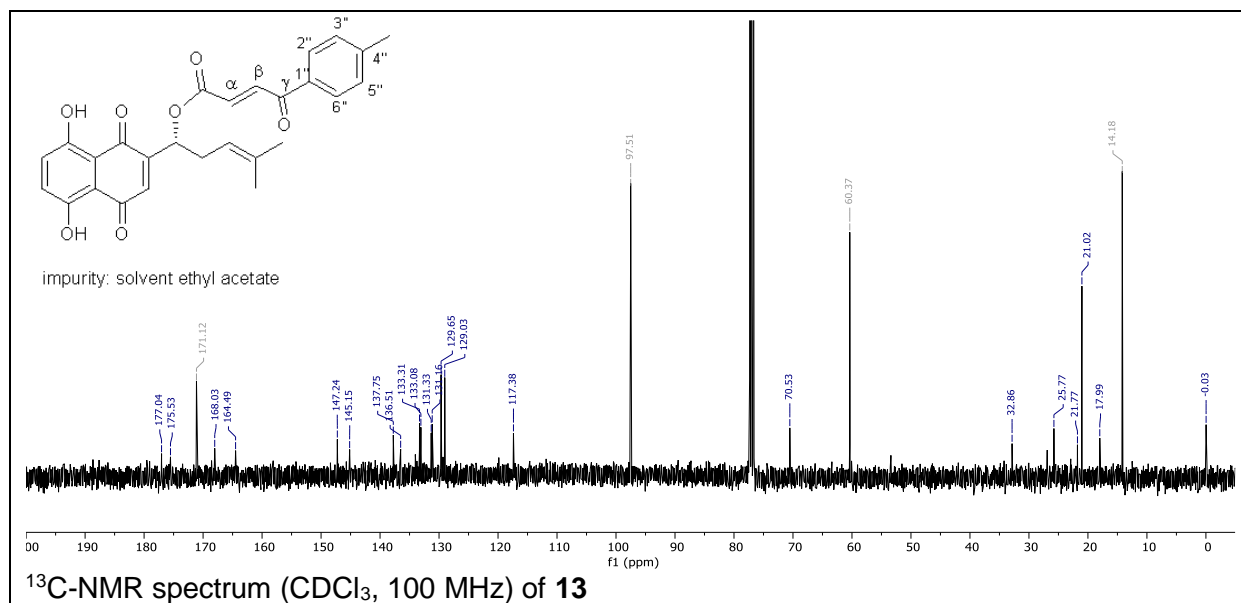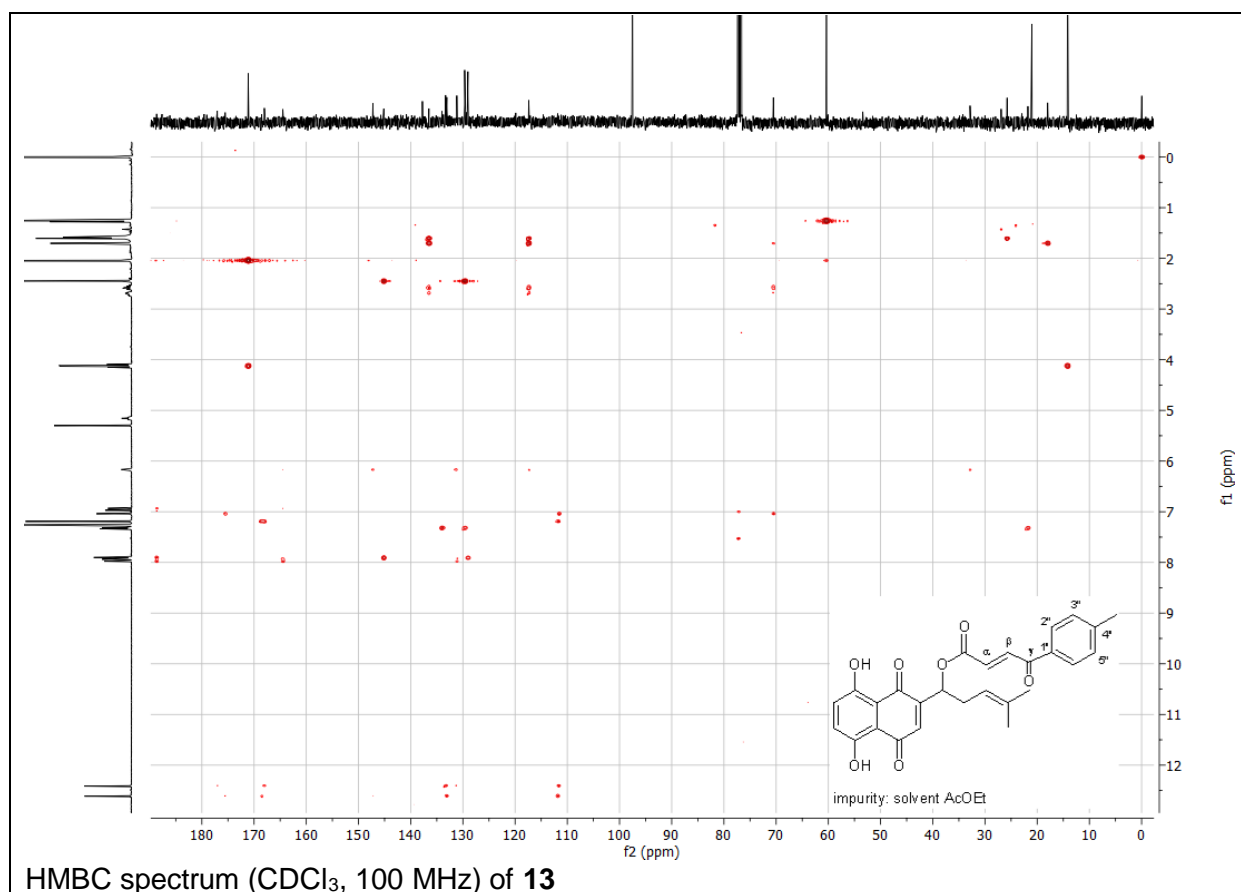

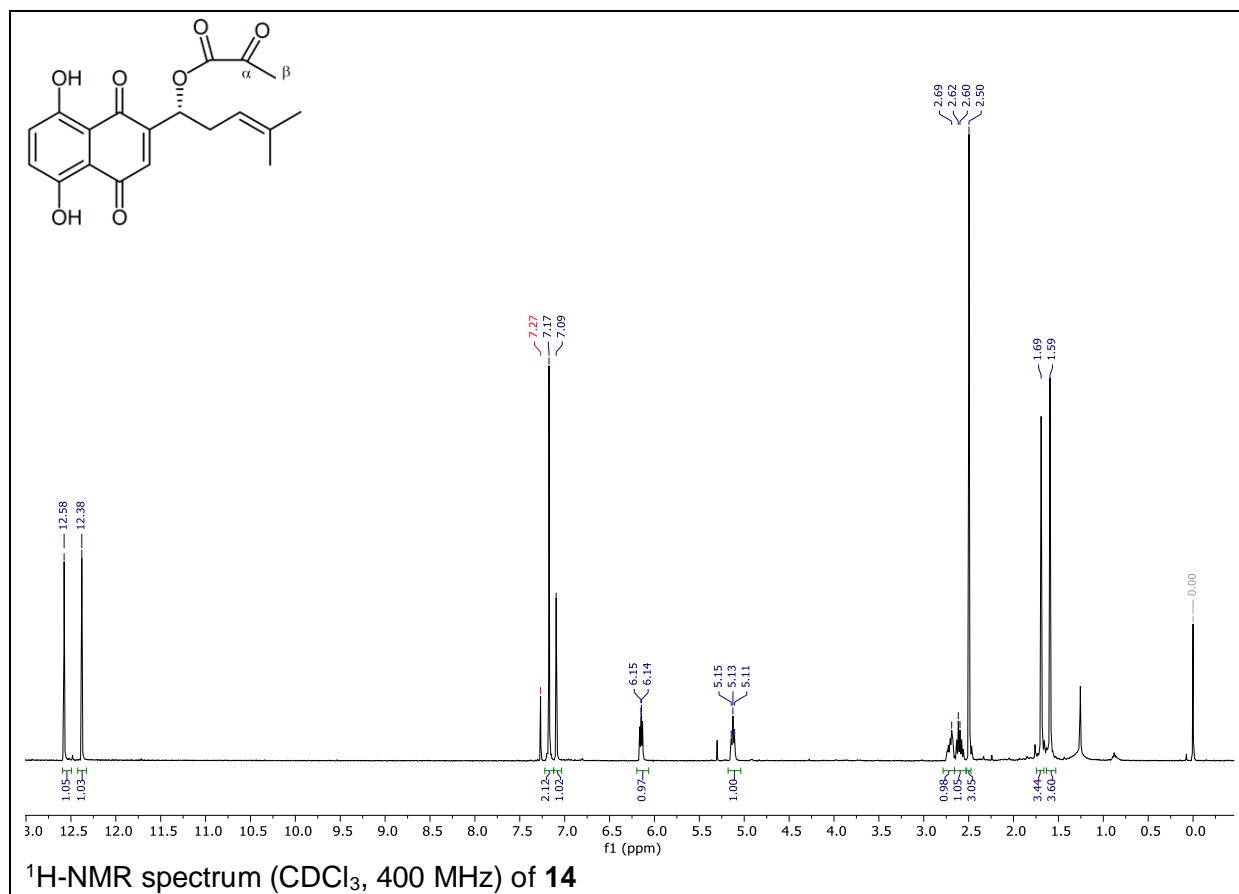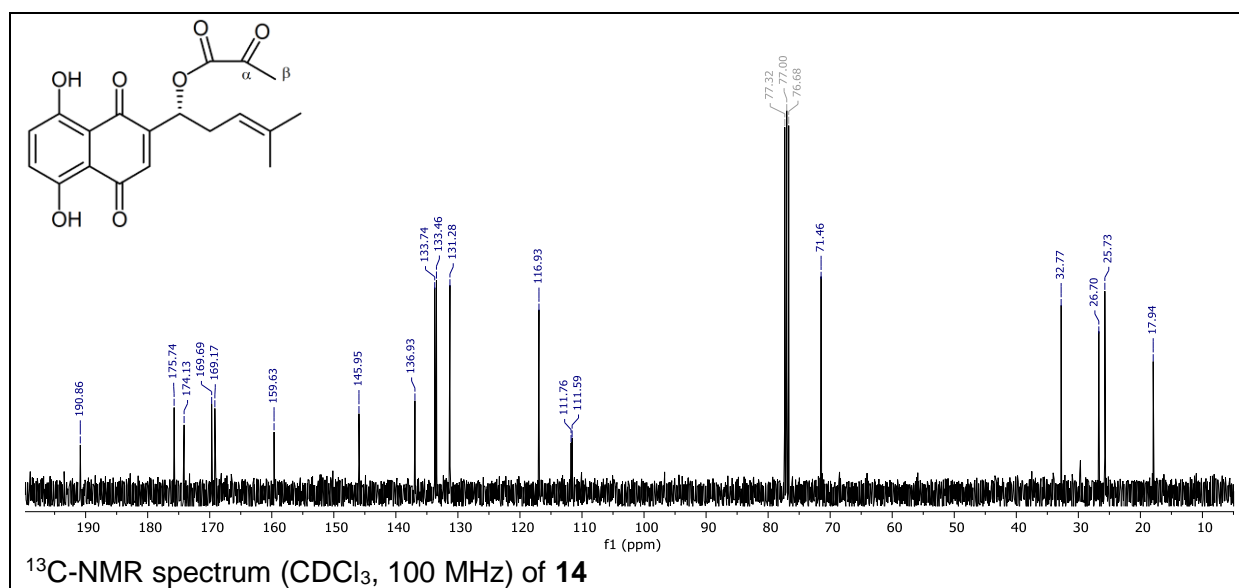

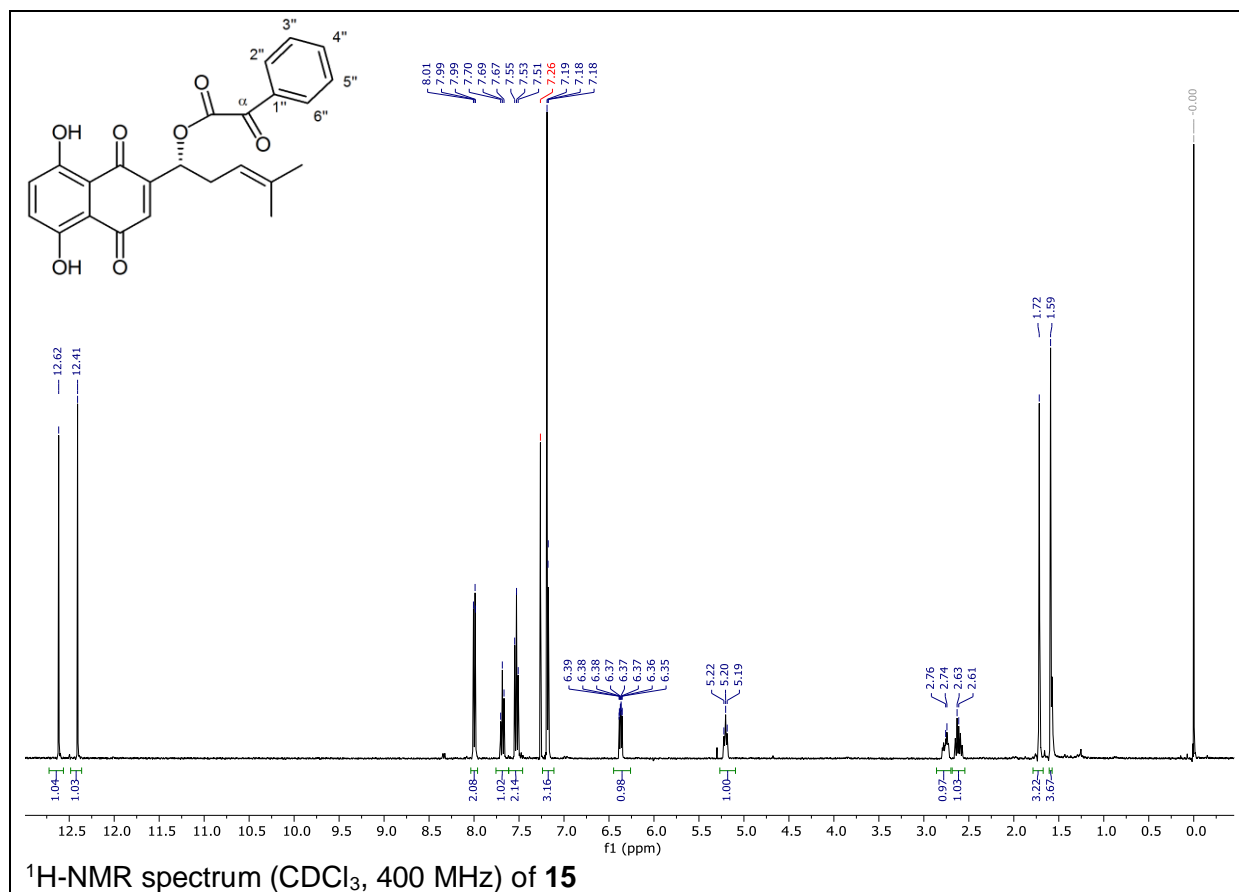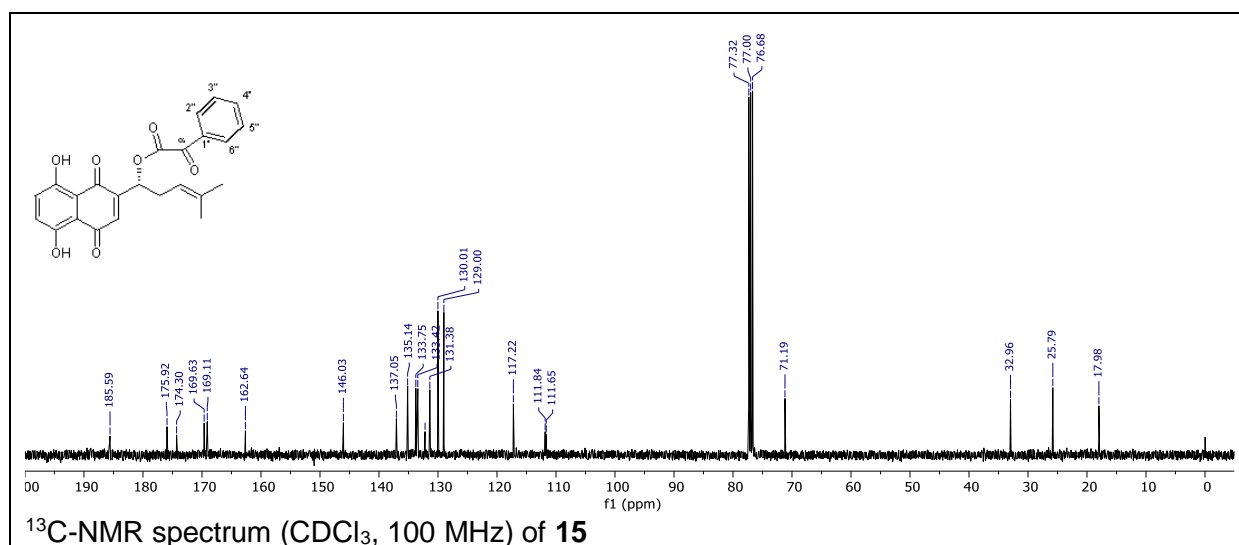



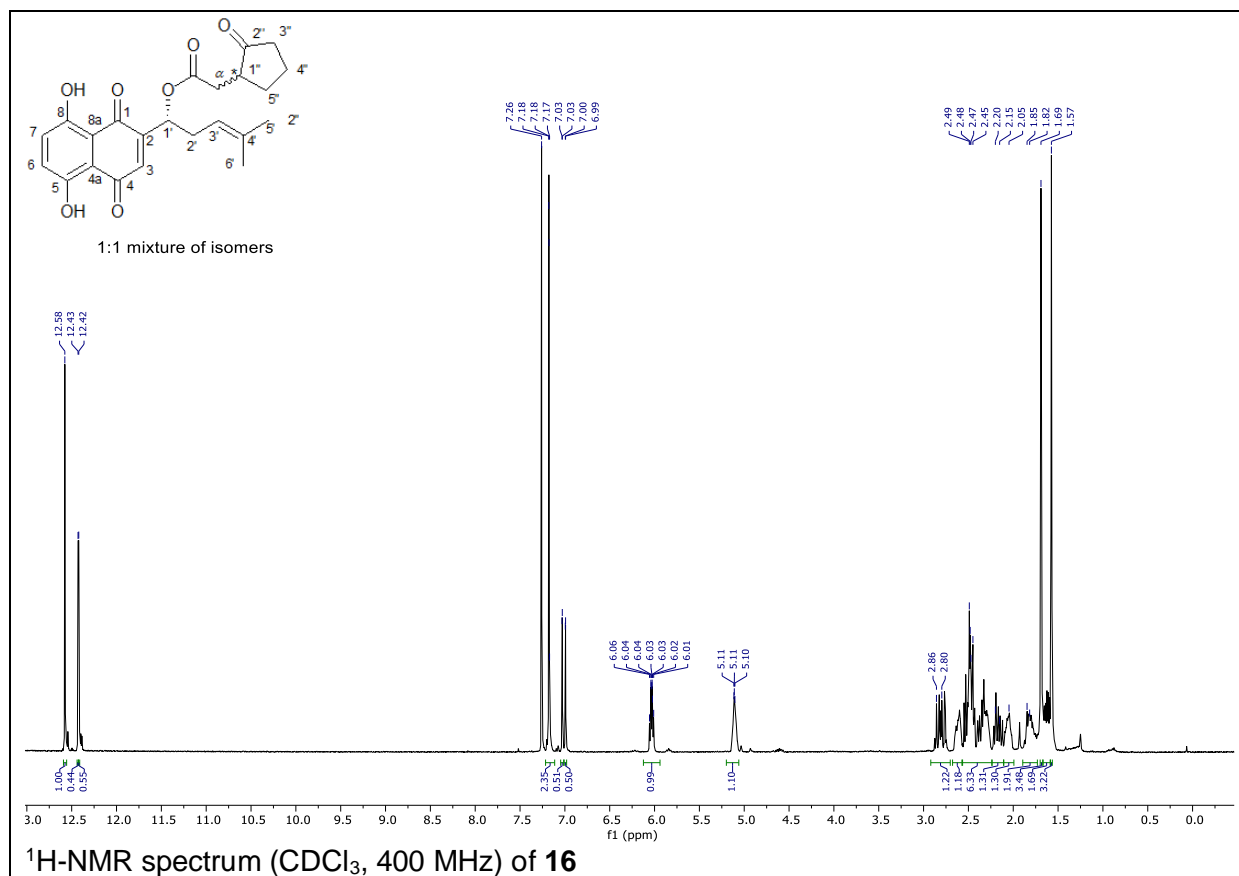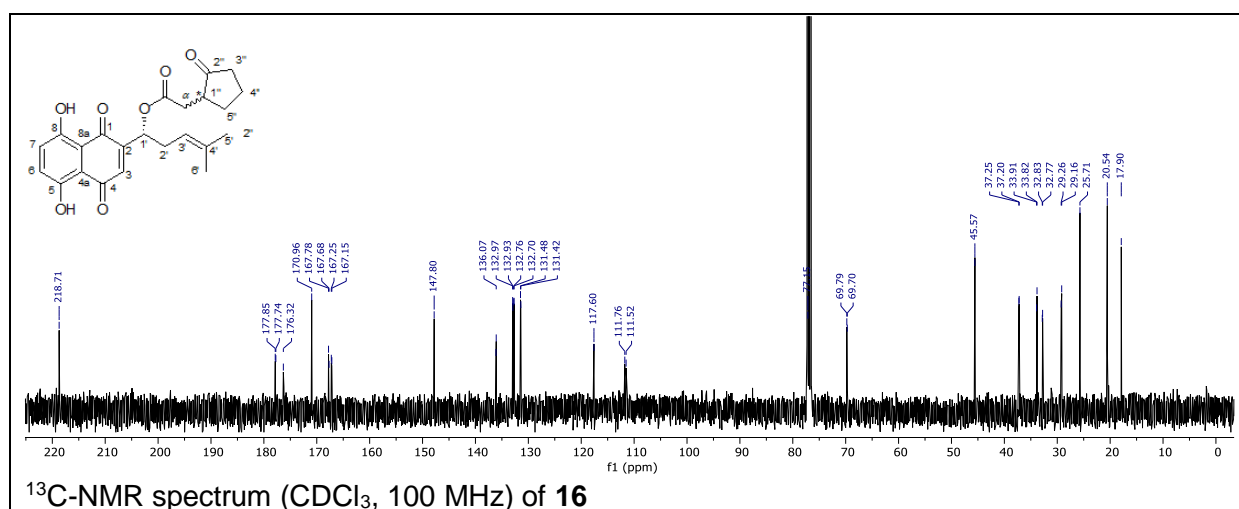

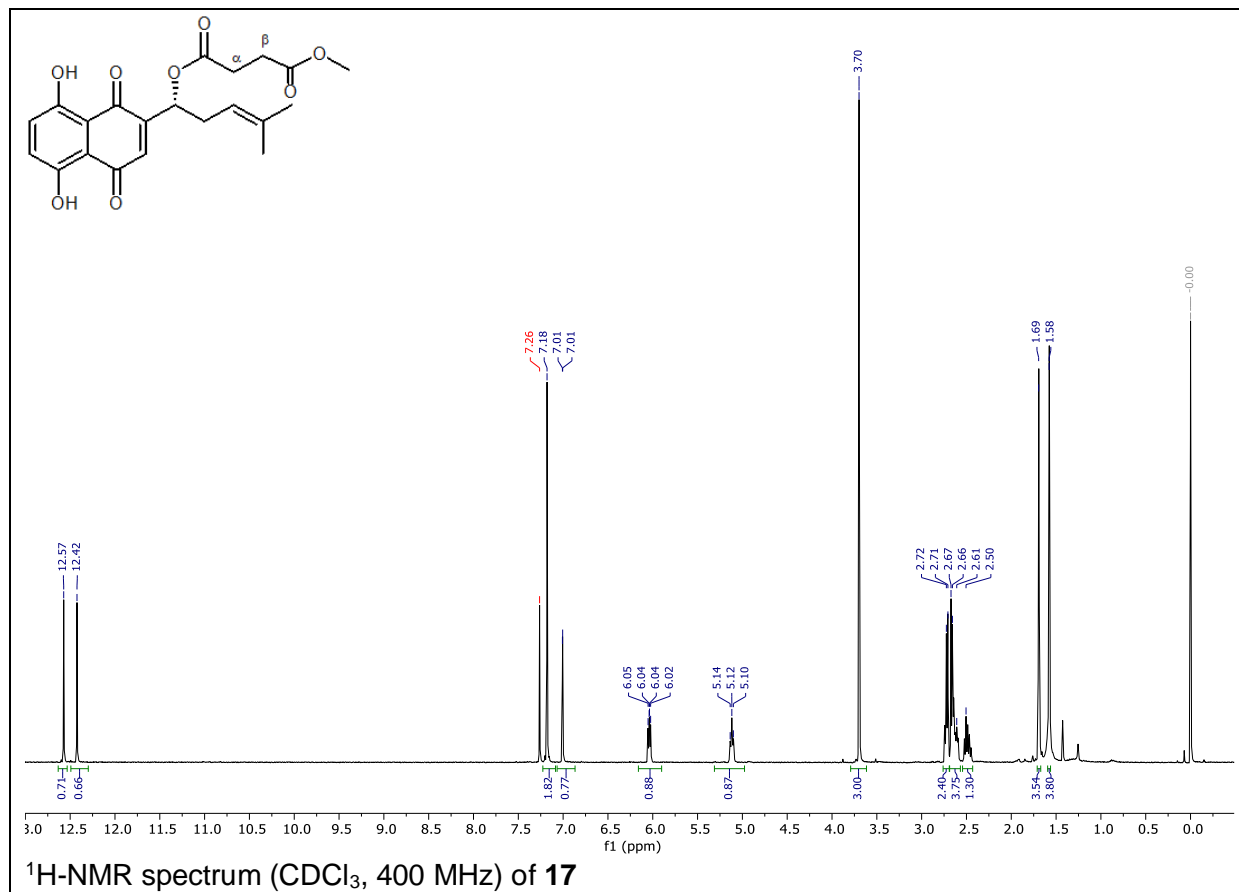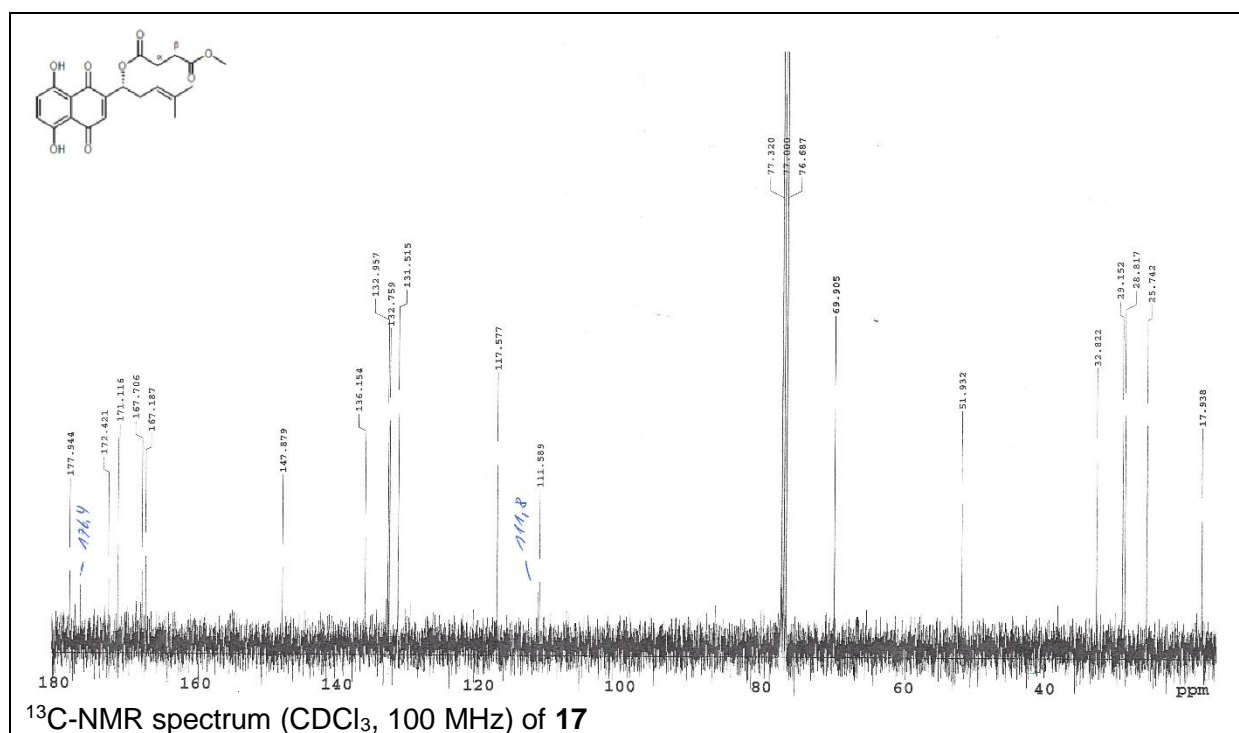

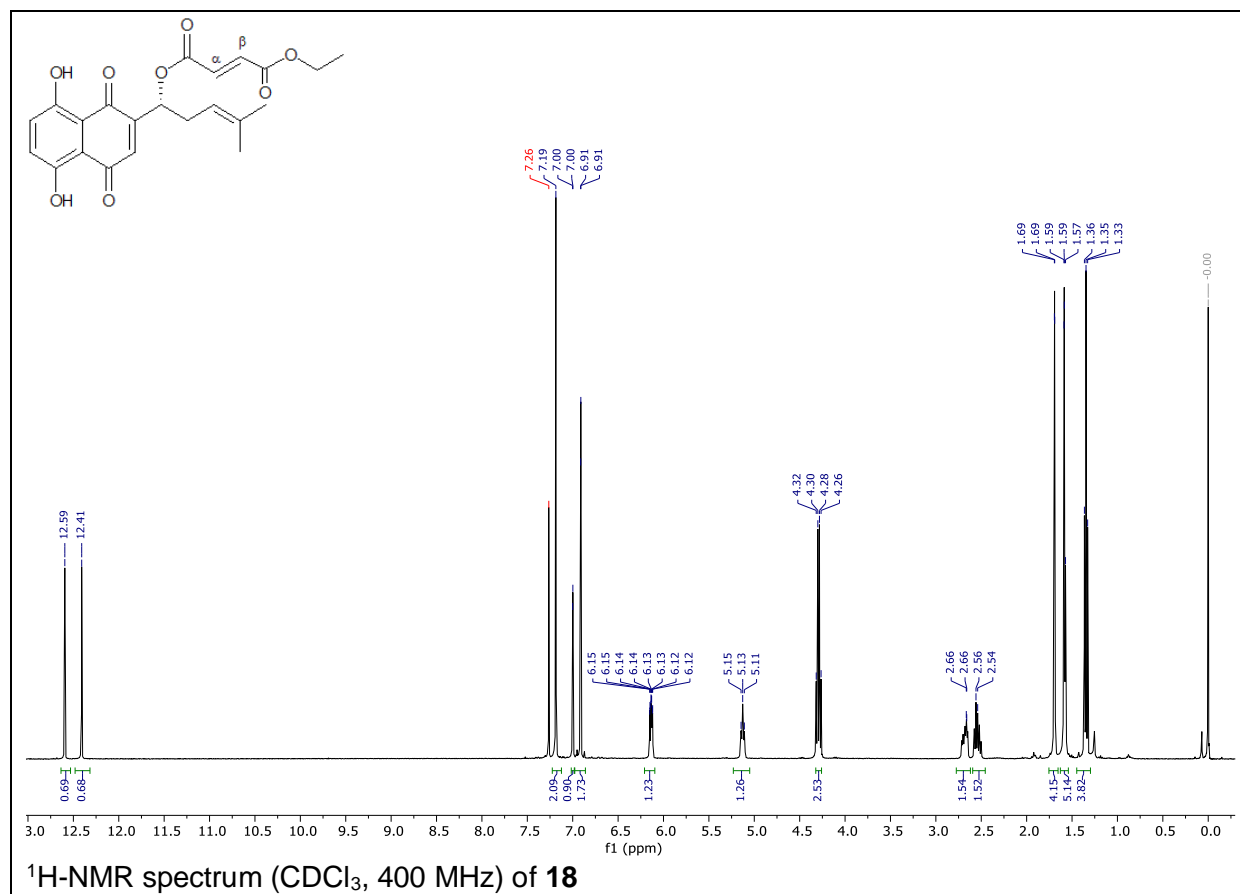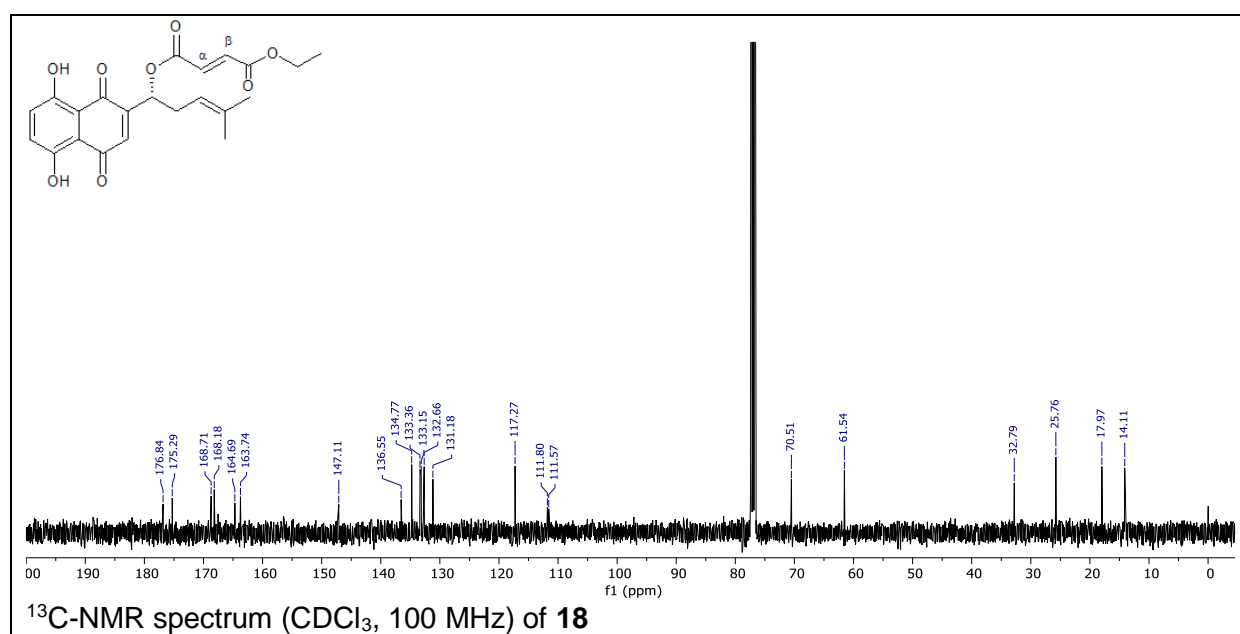

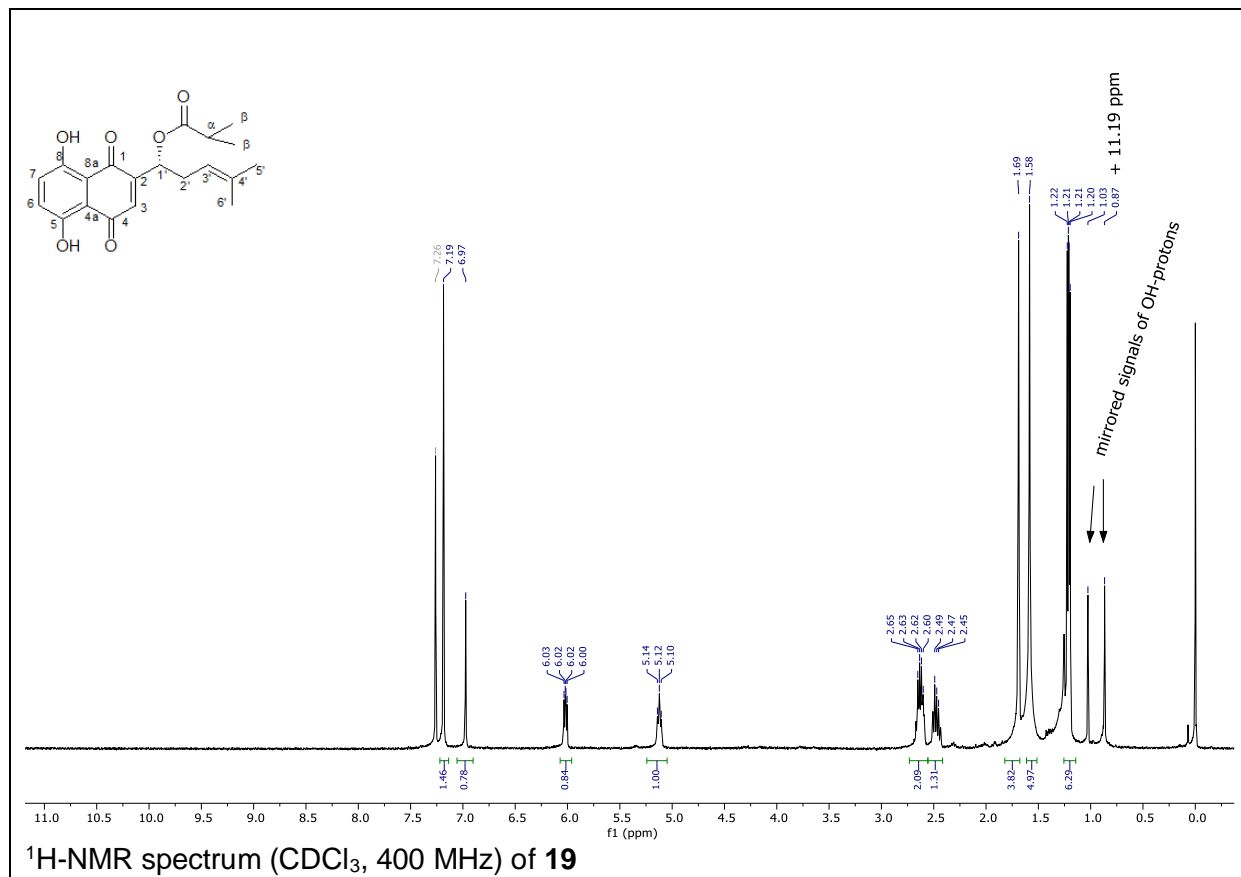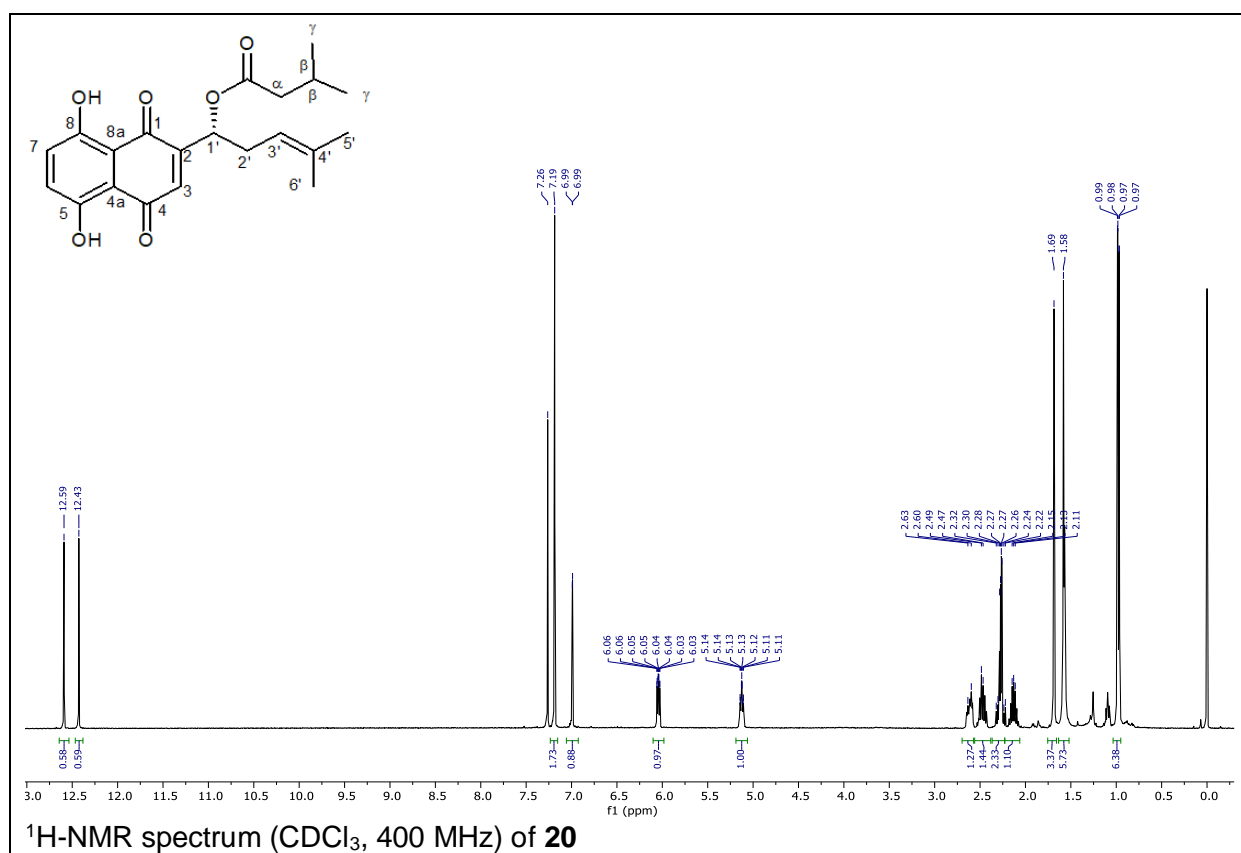

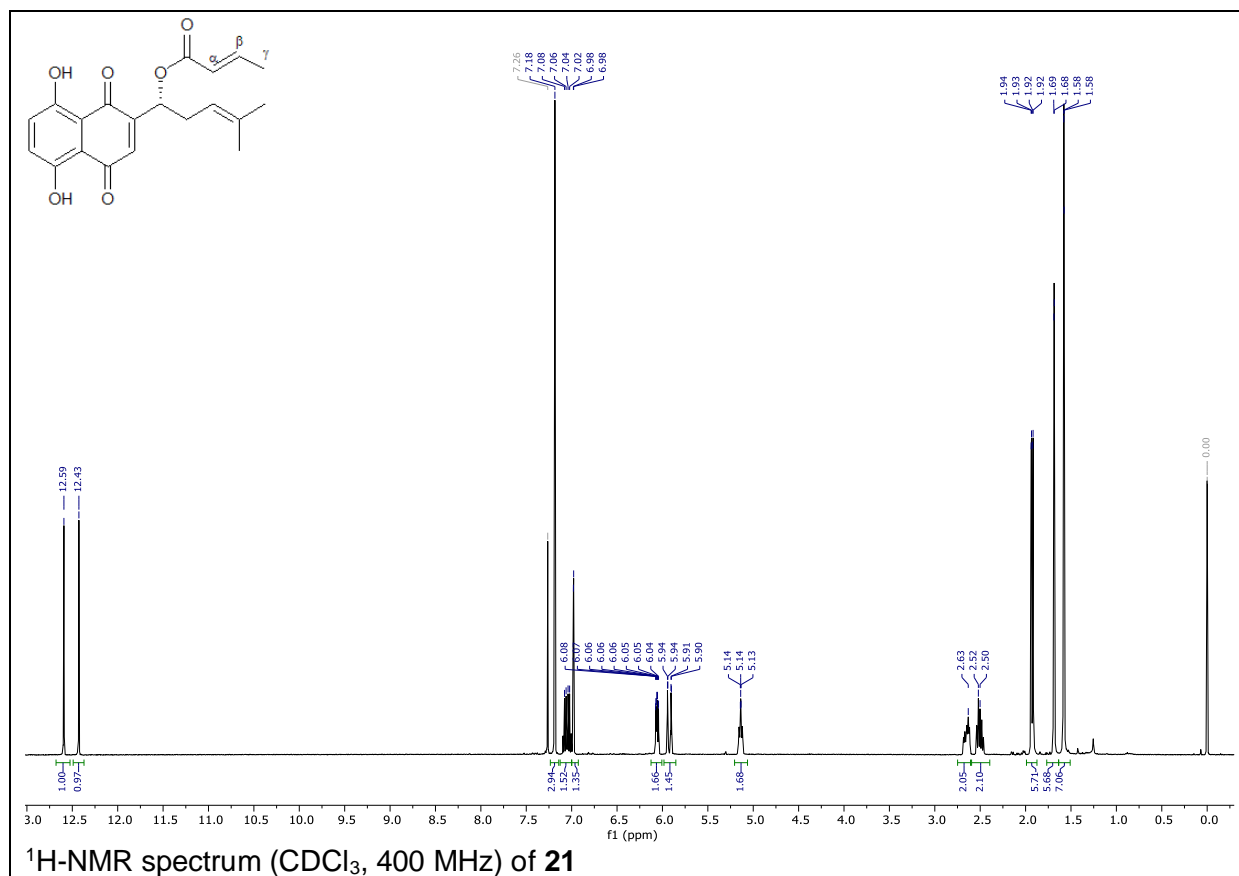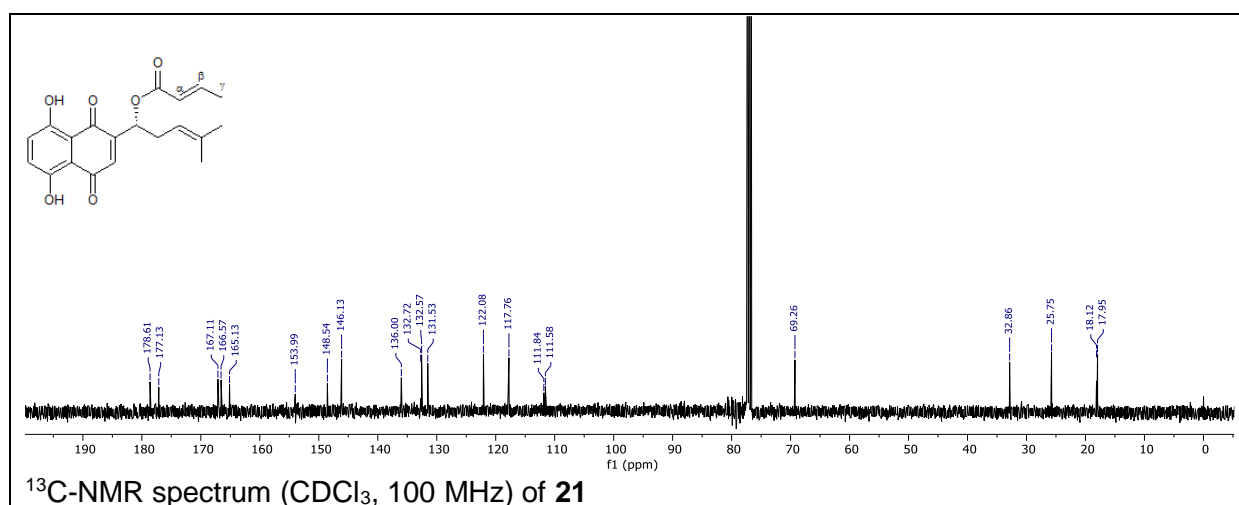

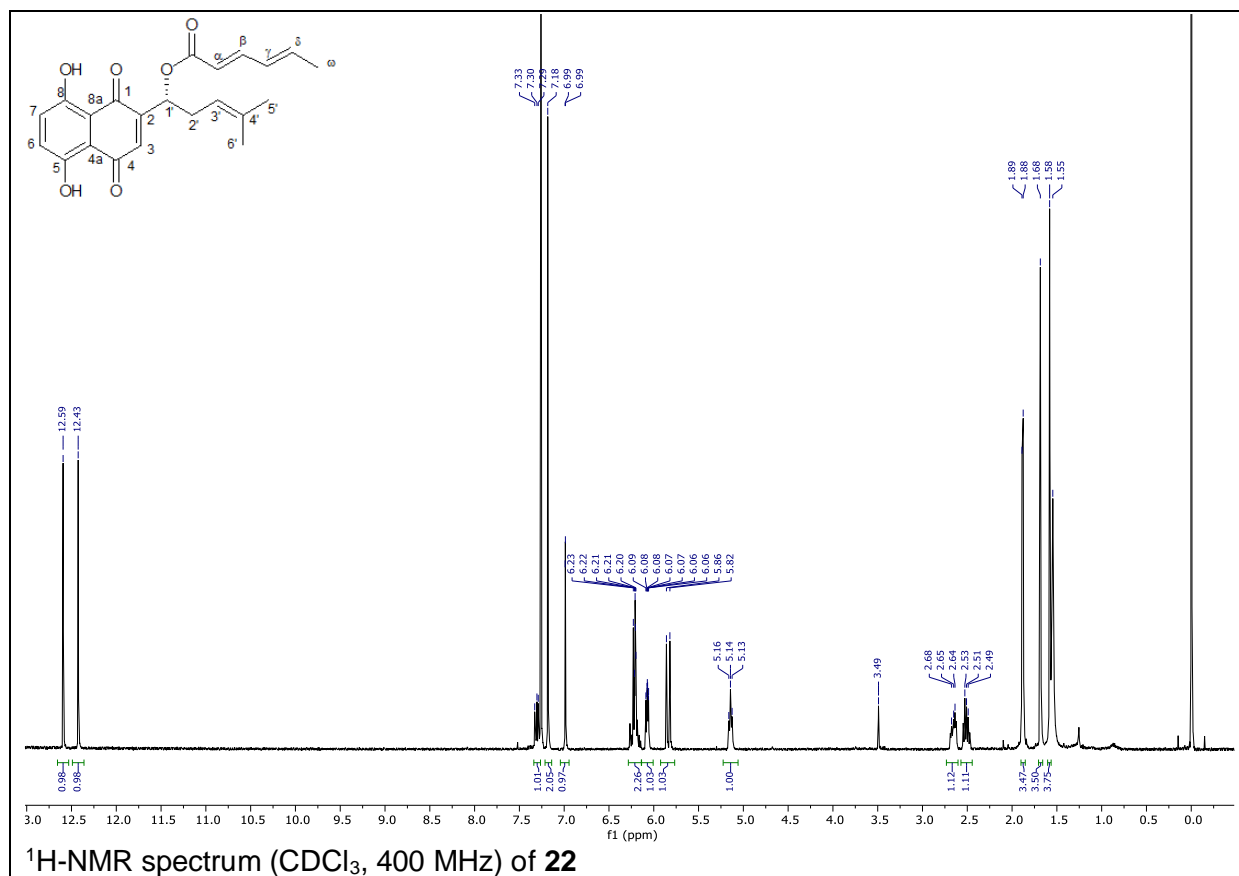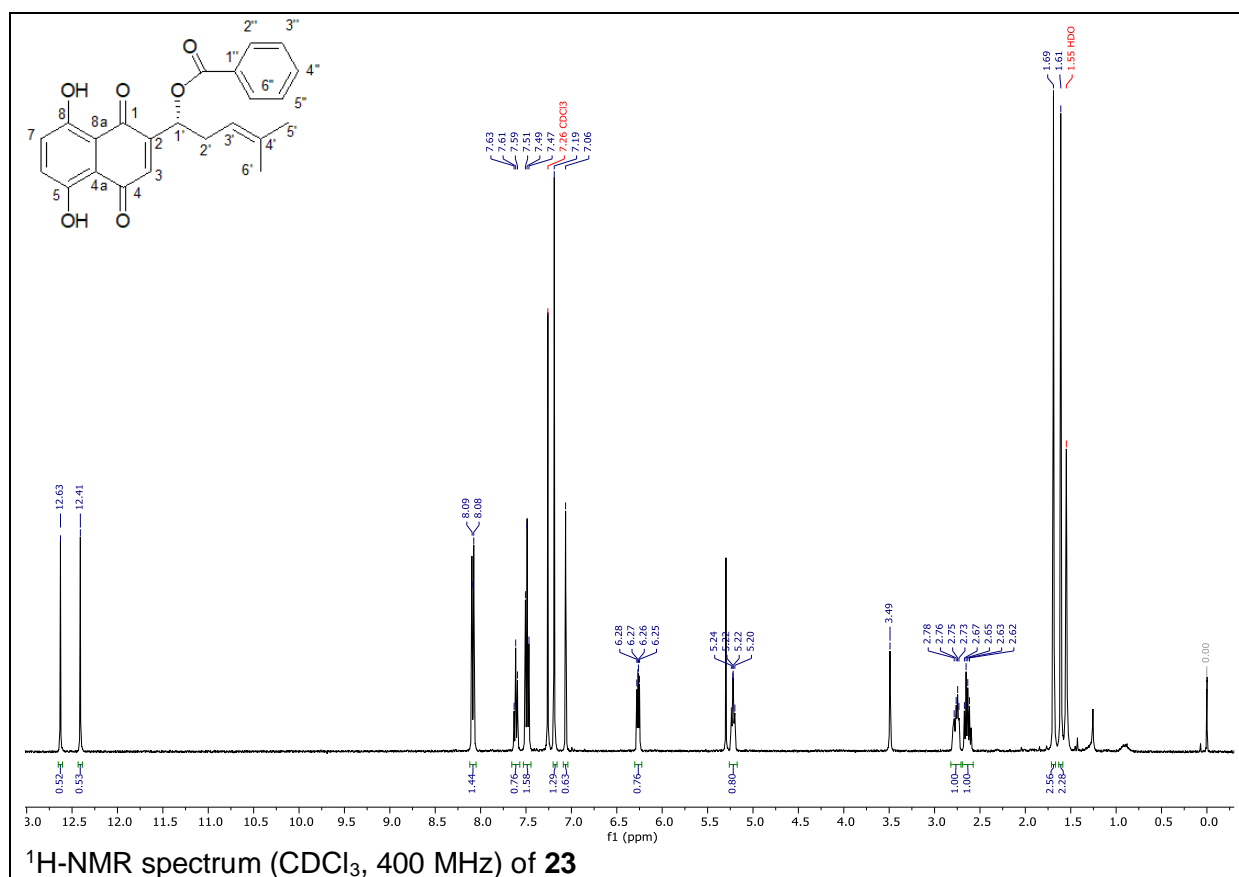

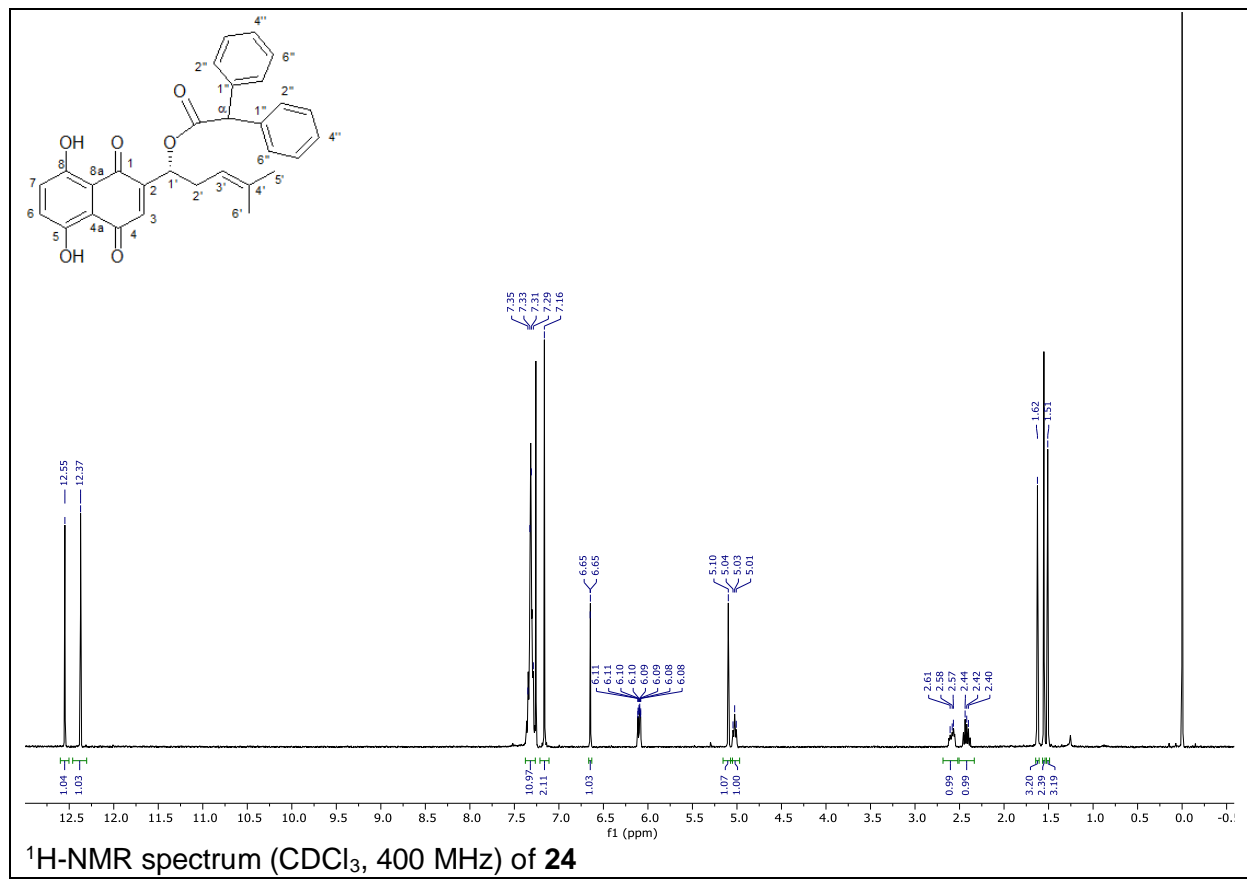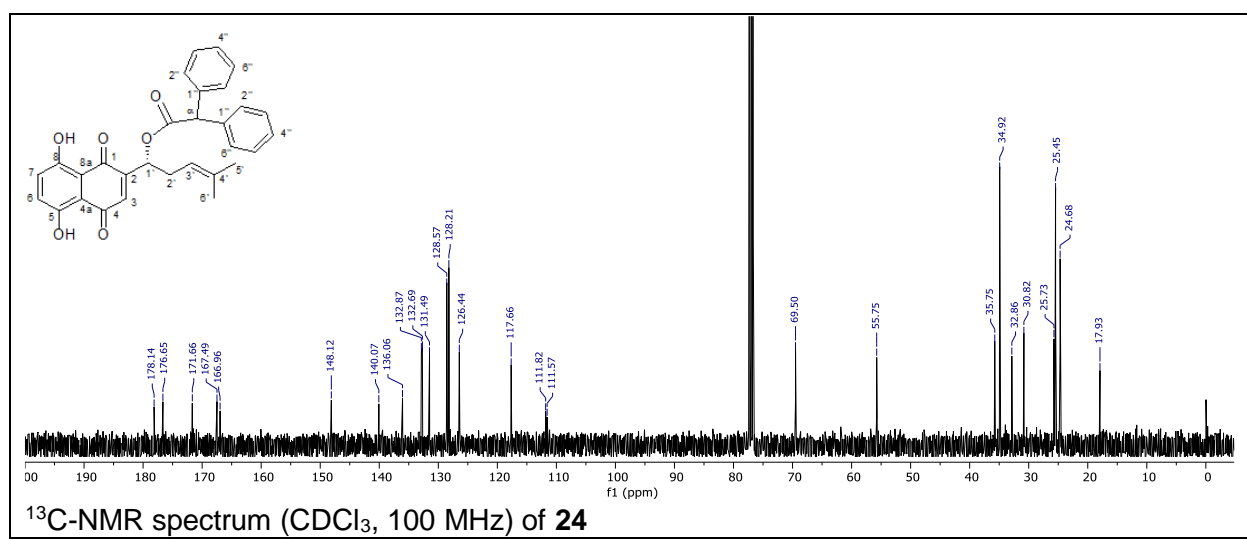

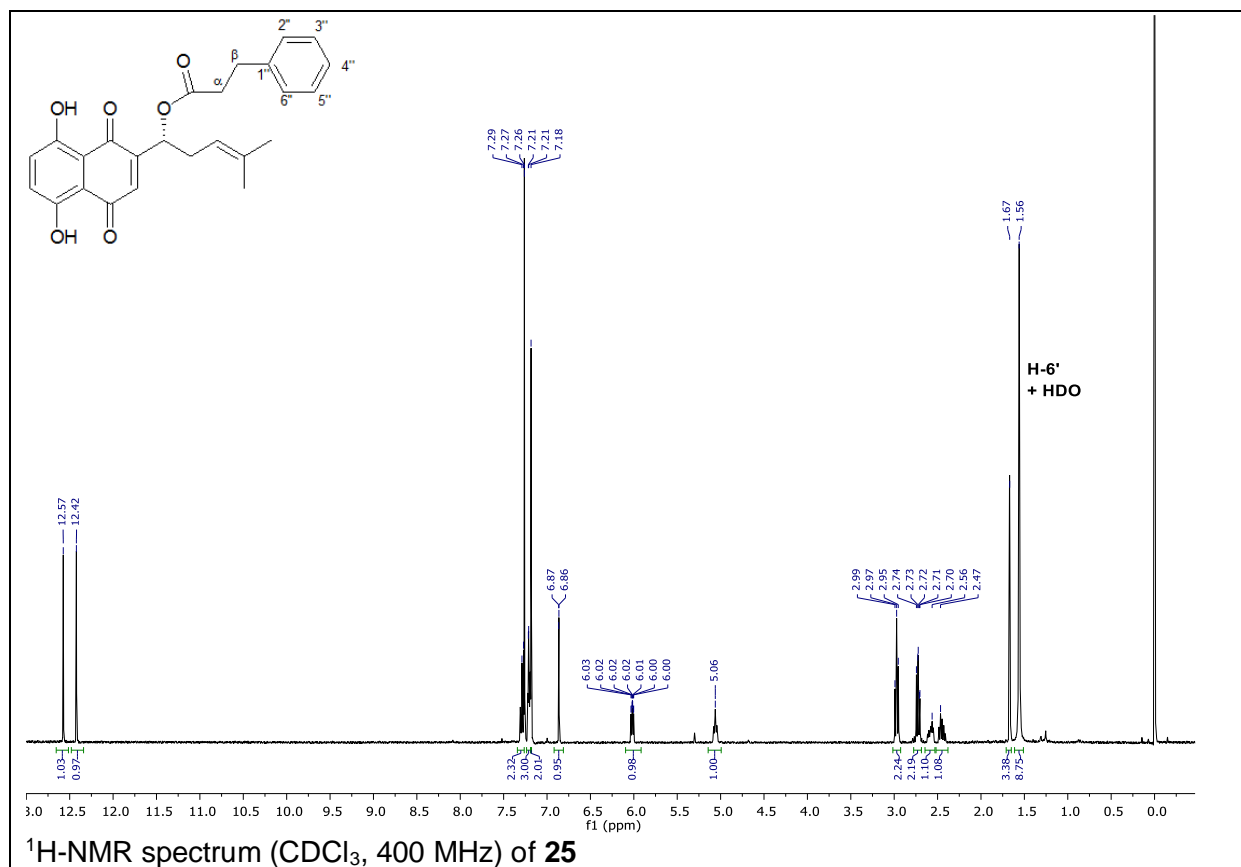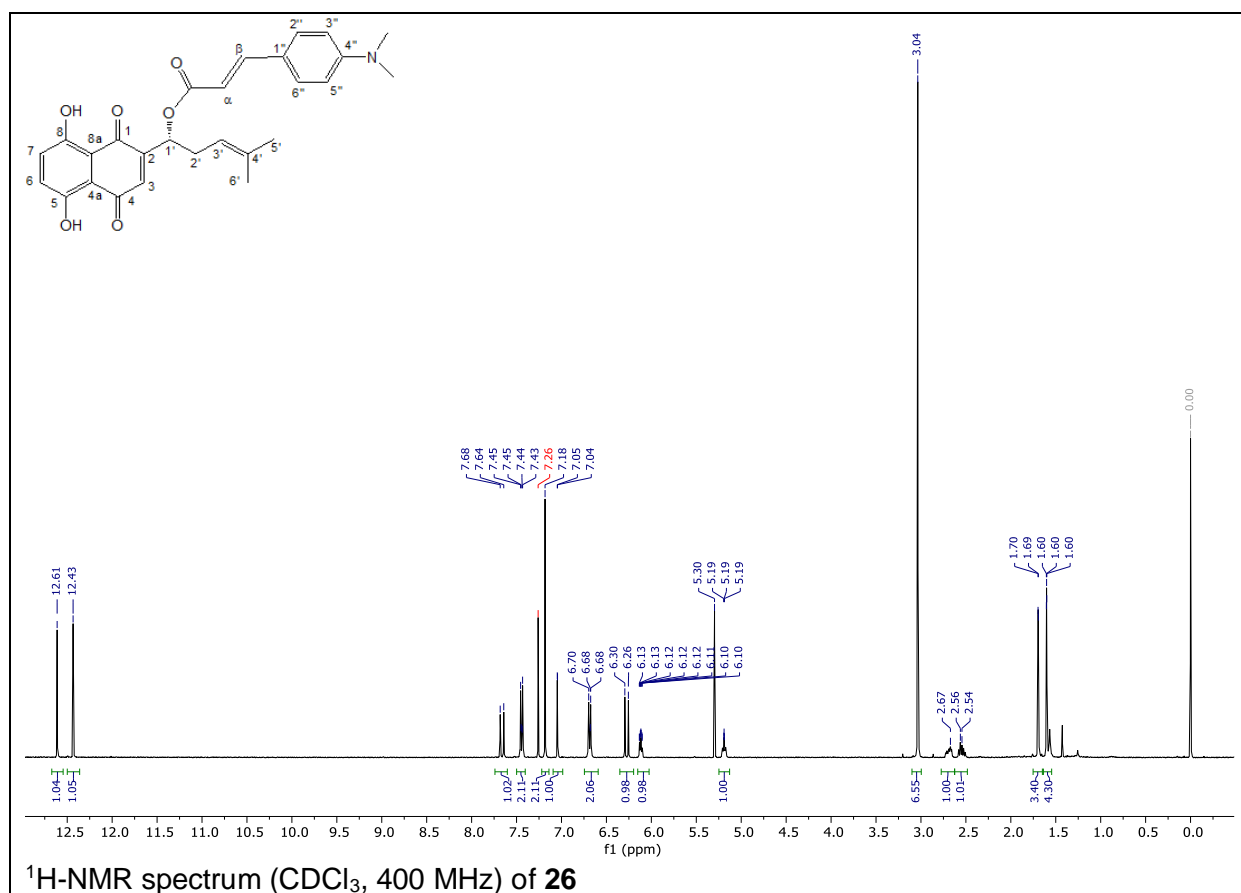



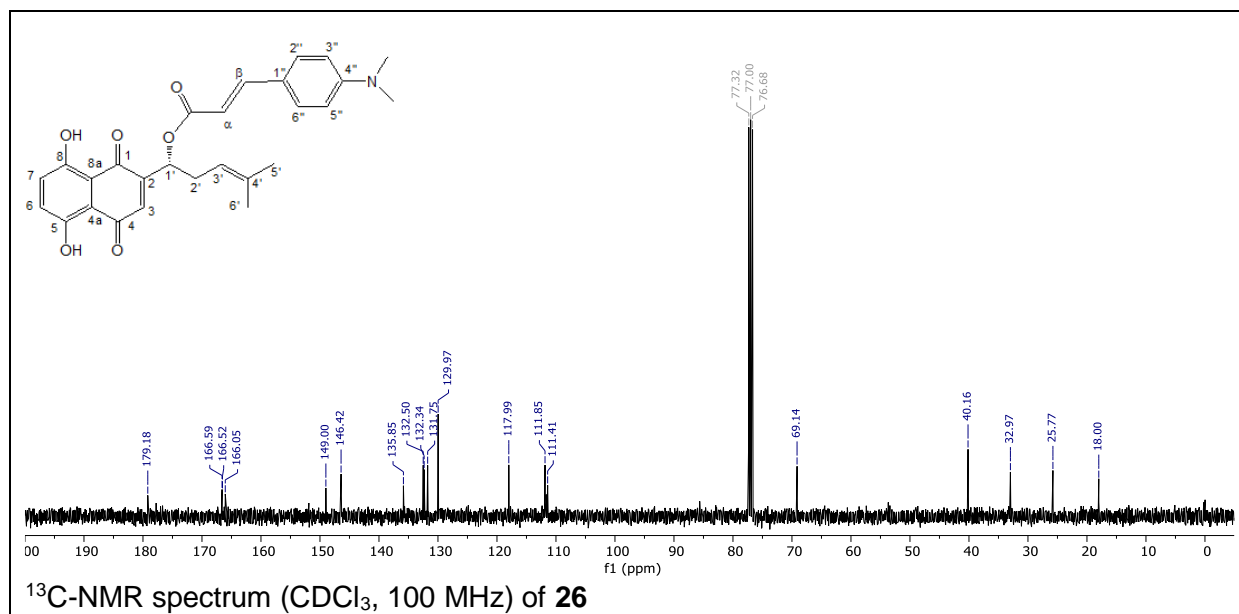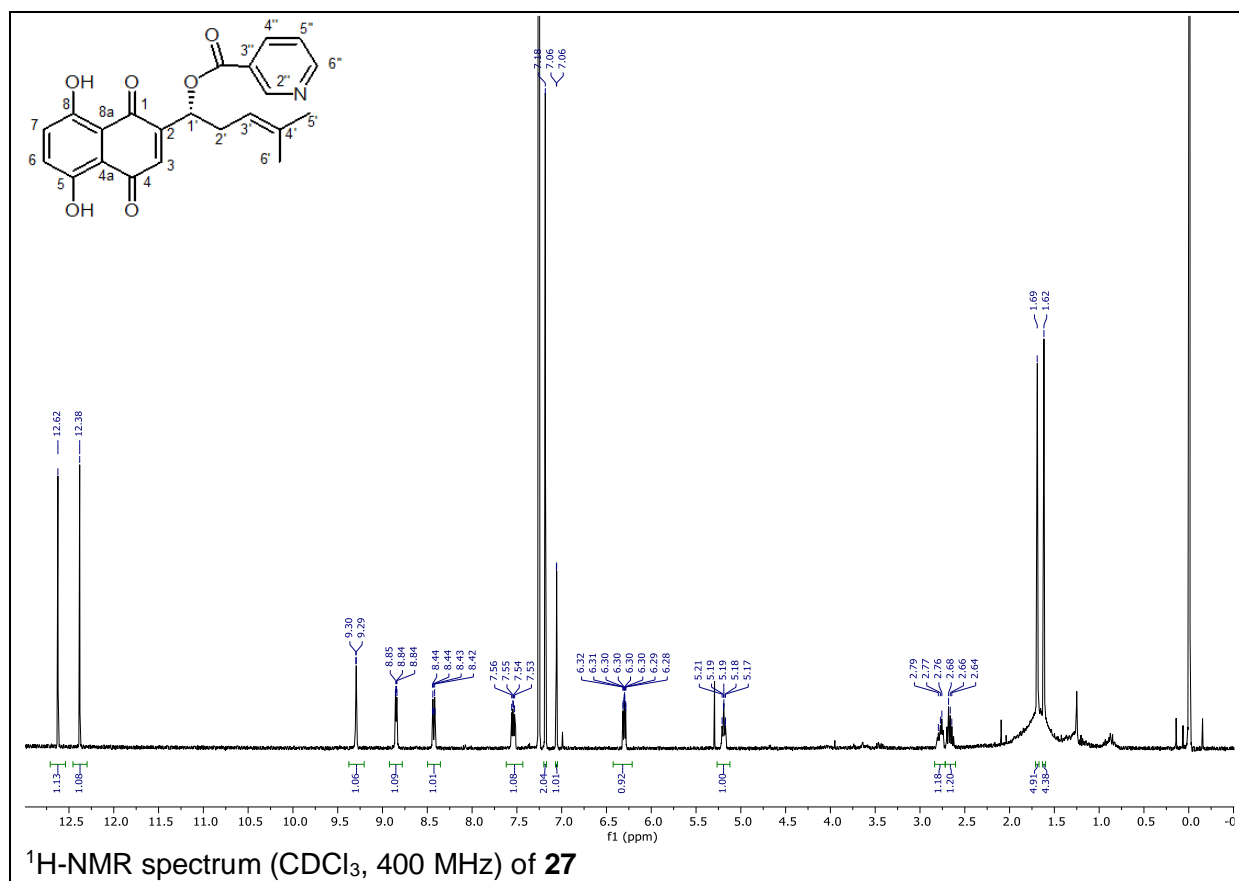

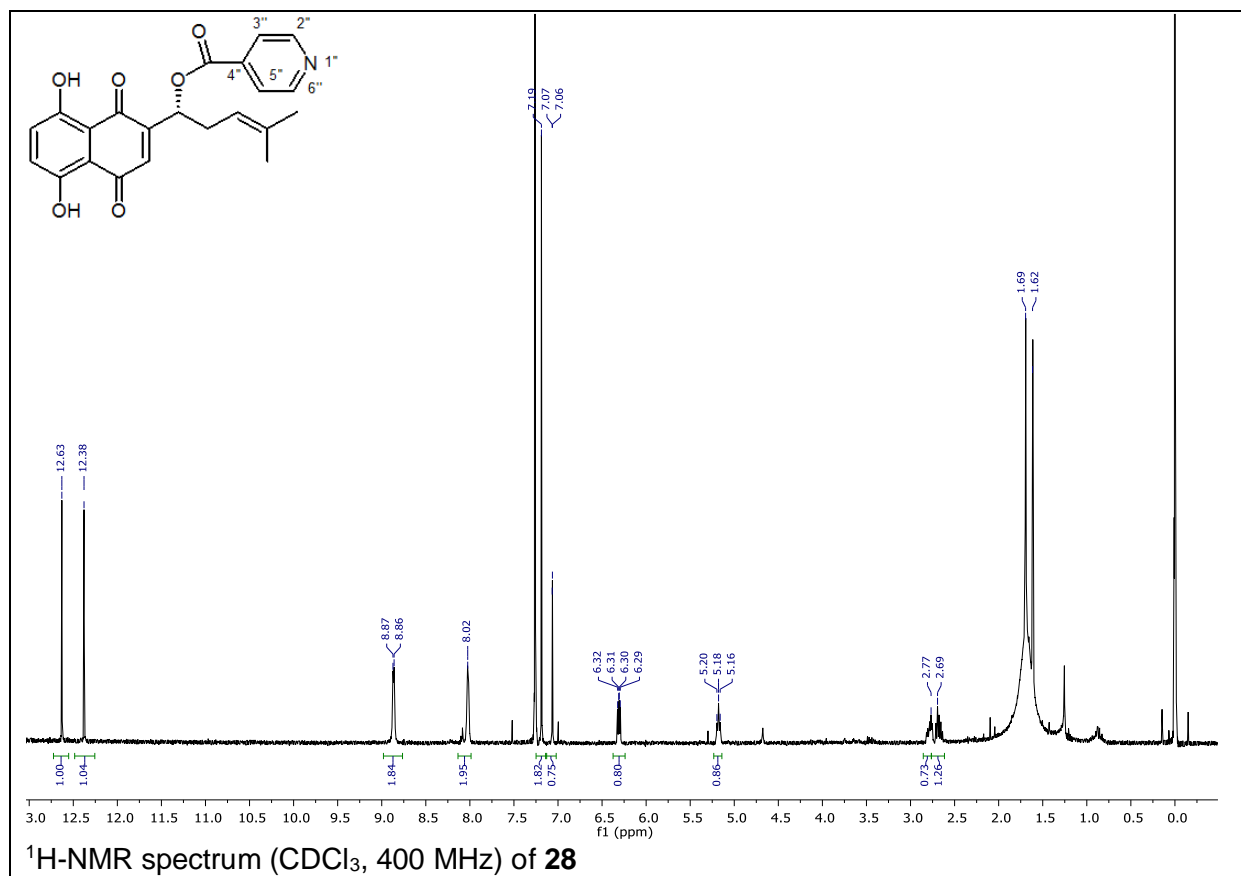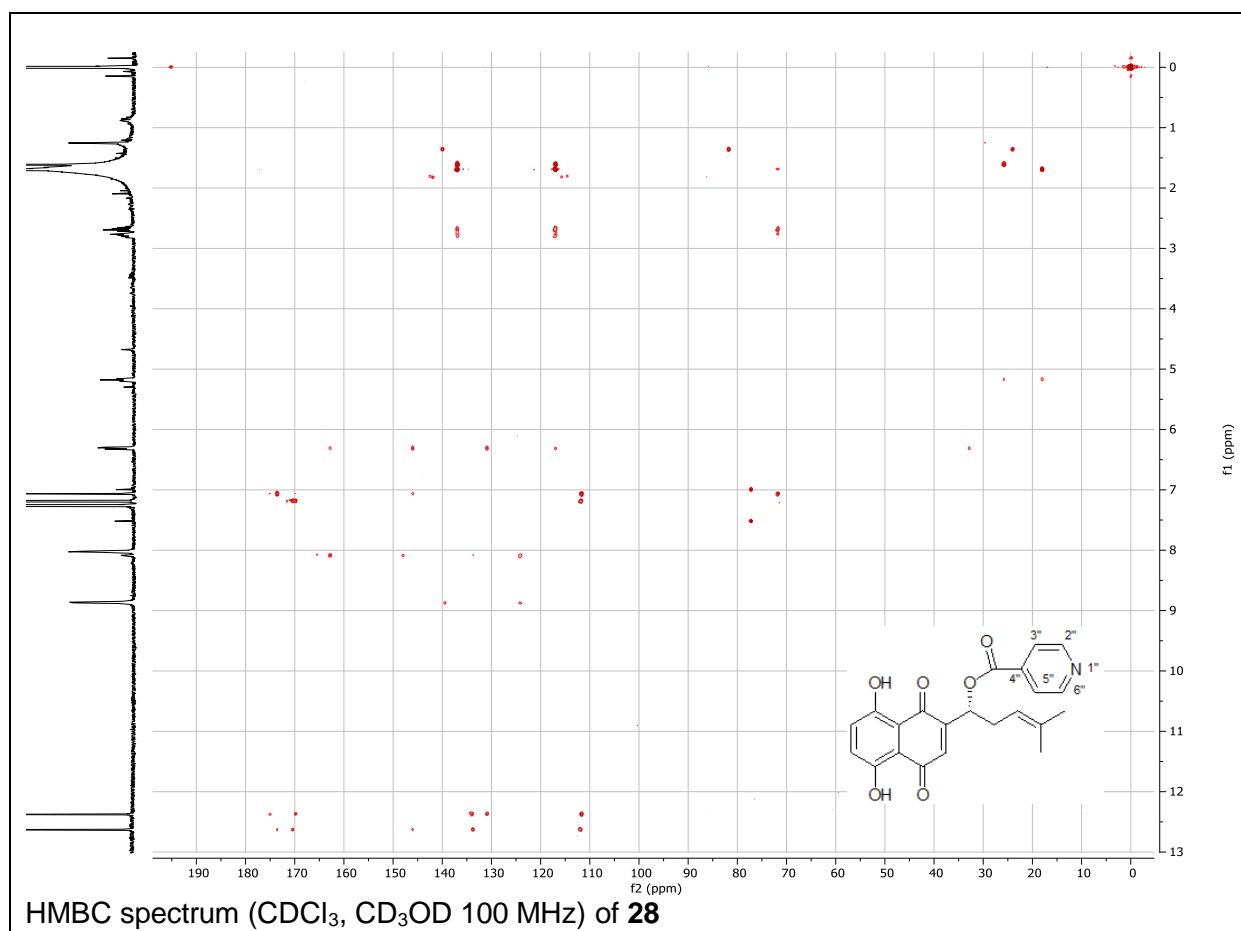

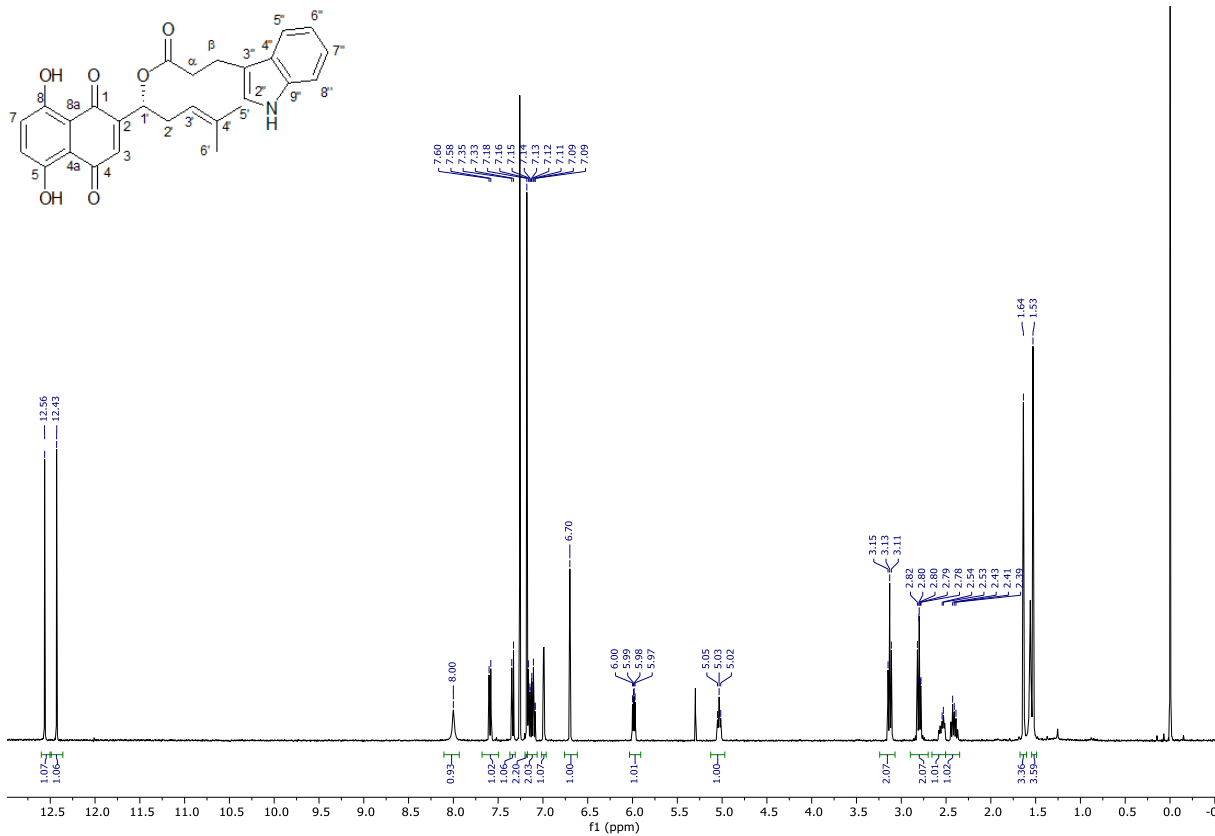

**<sup>1</sup>H-NMR spectrum (CDCl<sub>3</sub>, 400 MHz) of 29**

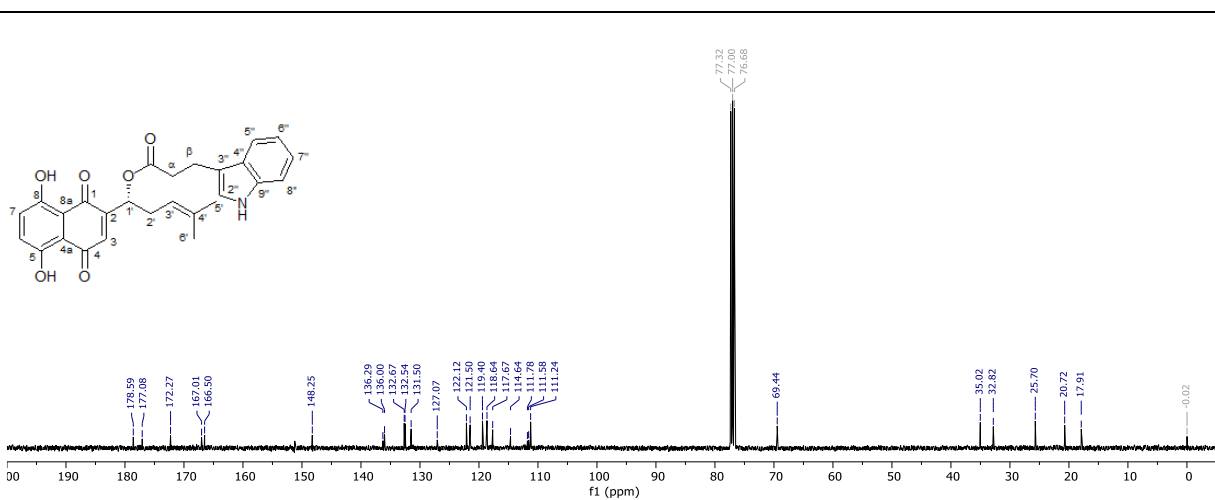

**<sup>13</sup>C-NMR spectrum (CDCl<sub>3</sub>, 100 MHz) of 29**

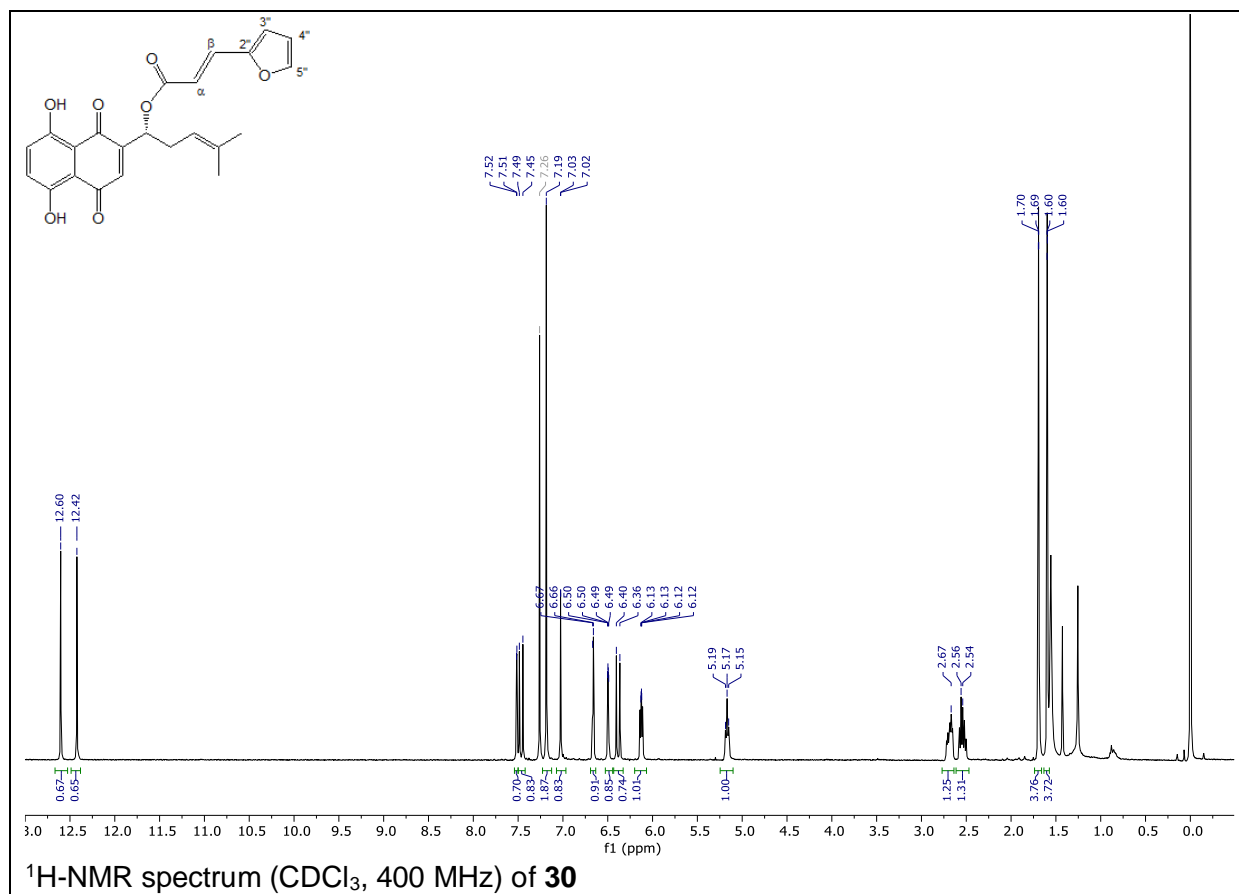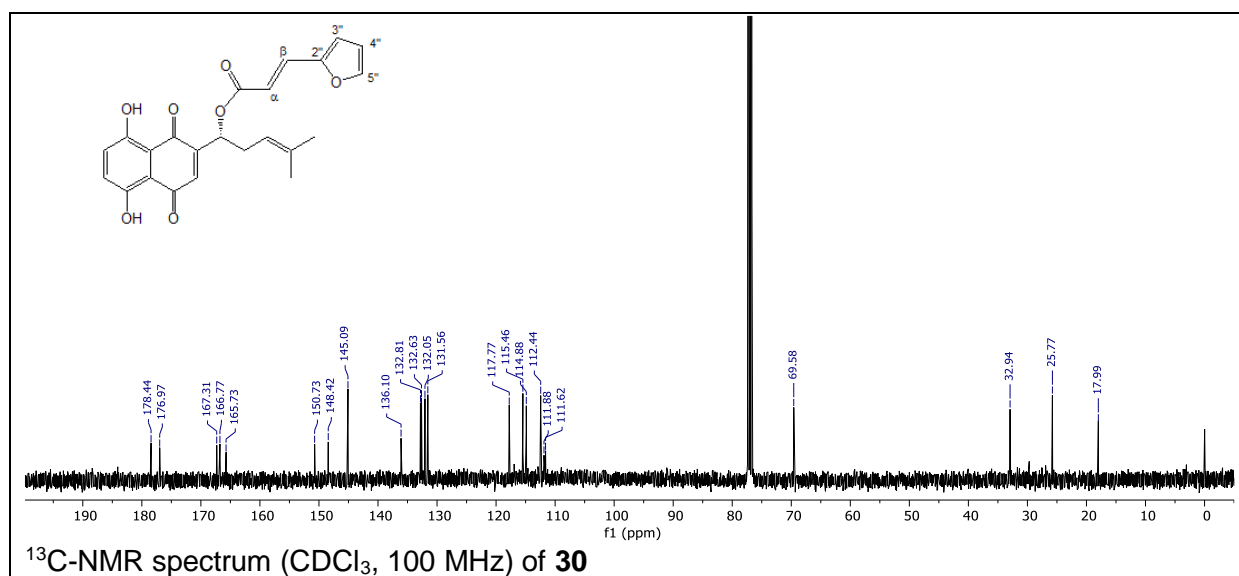

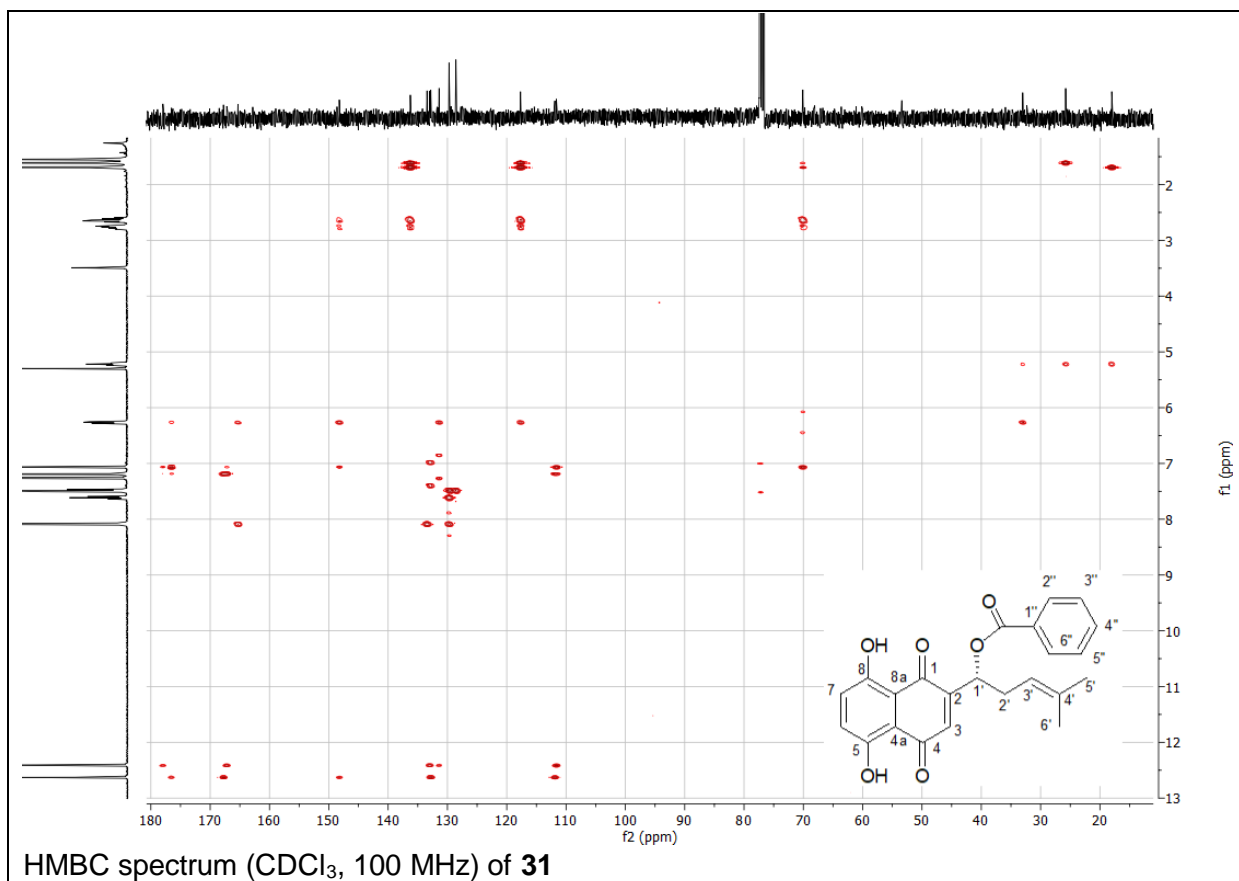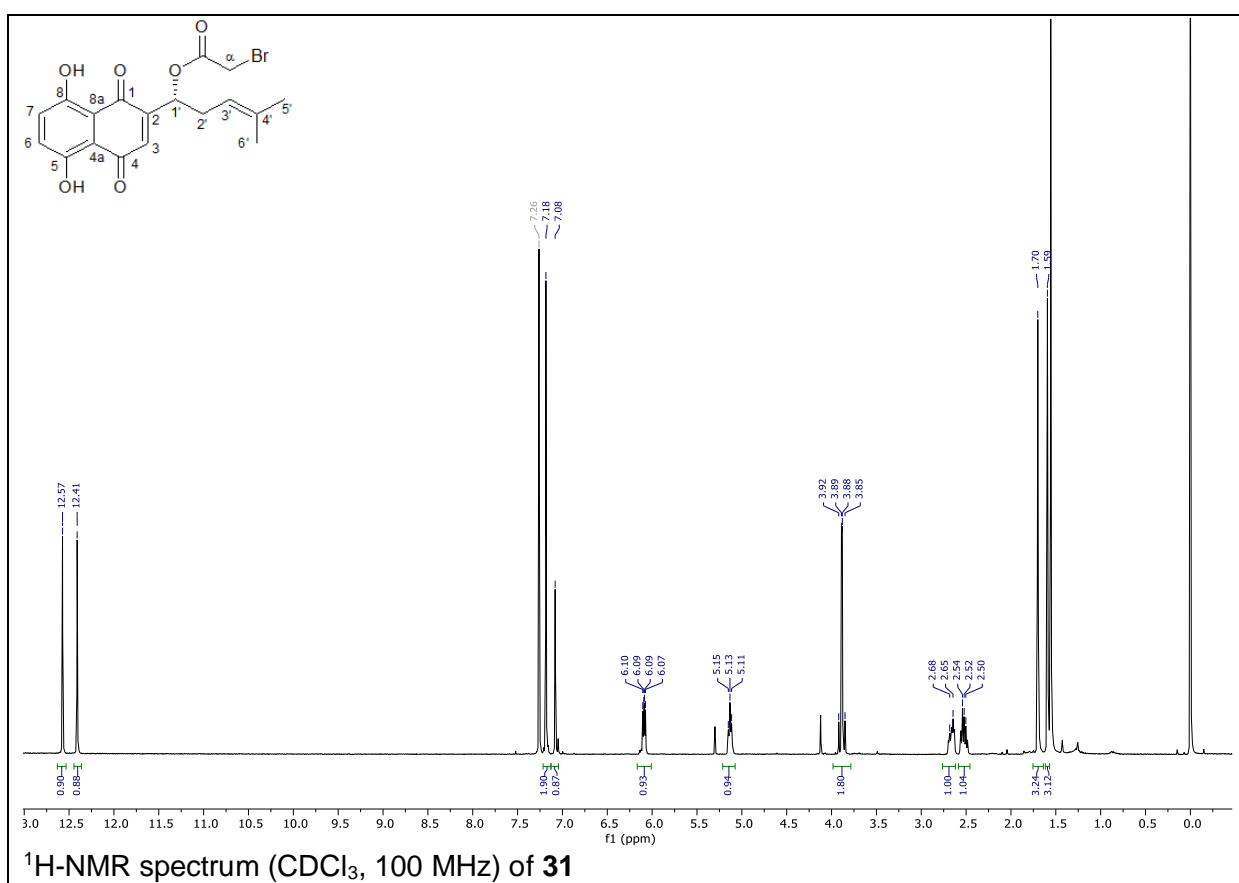

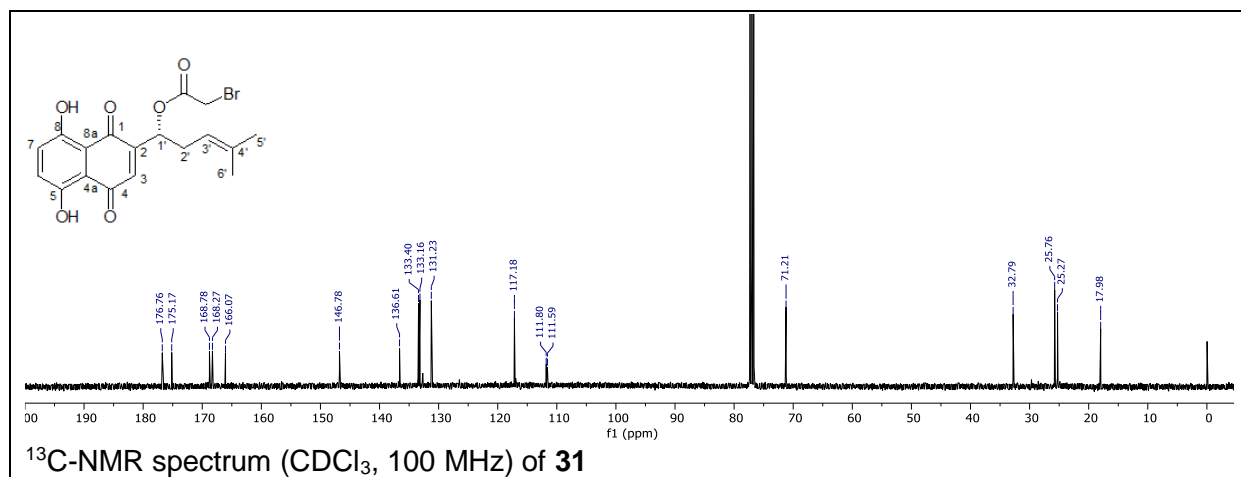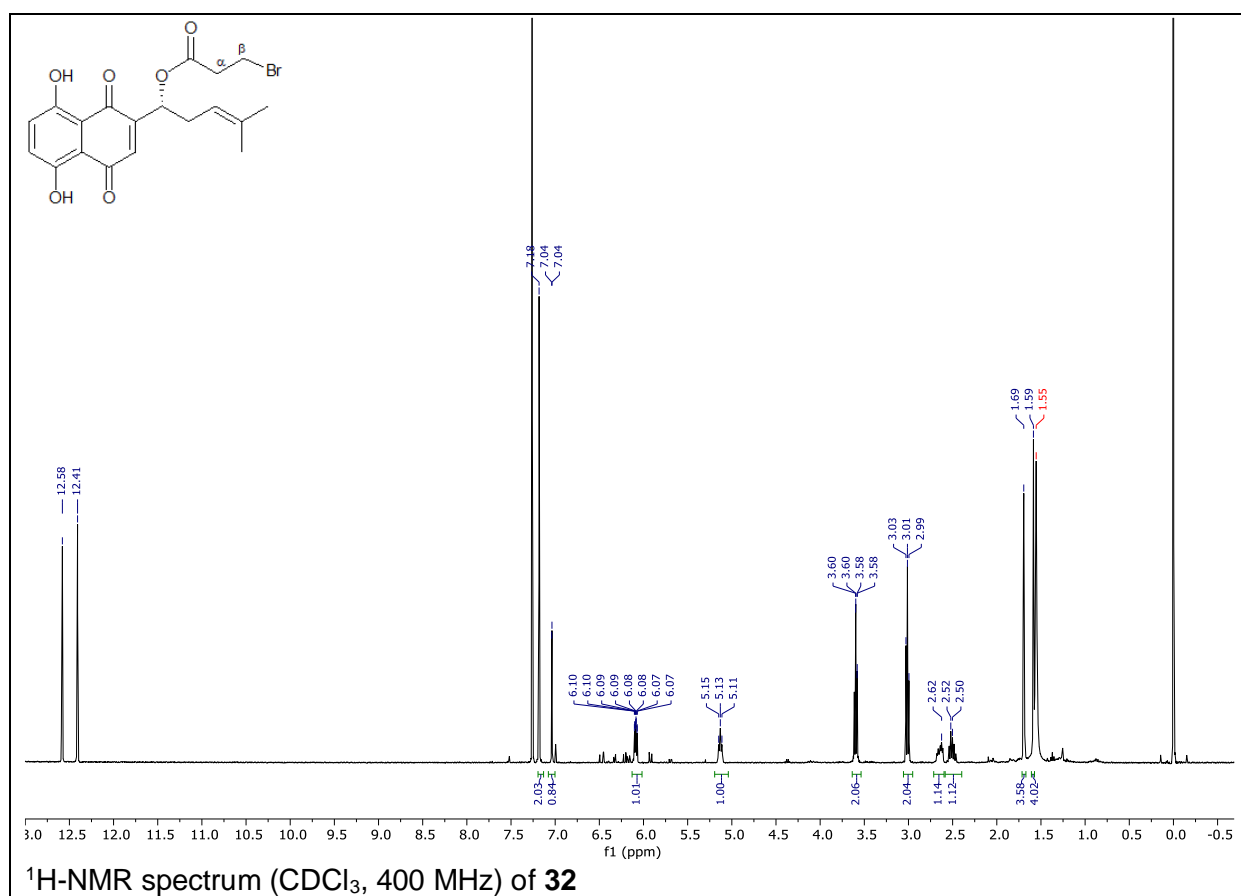

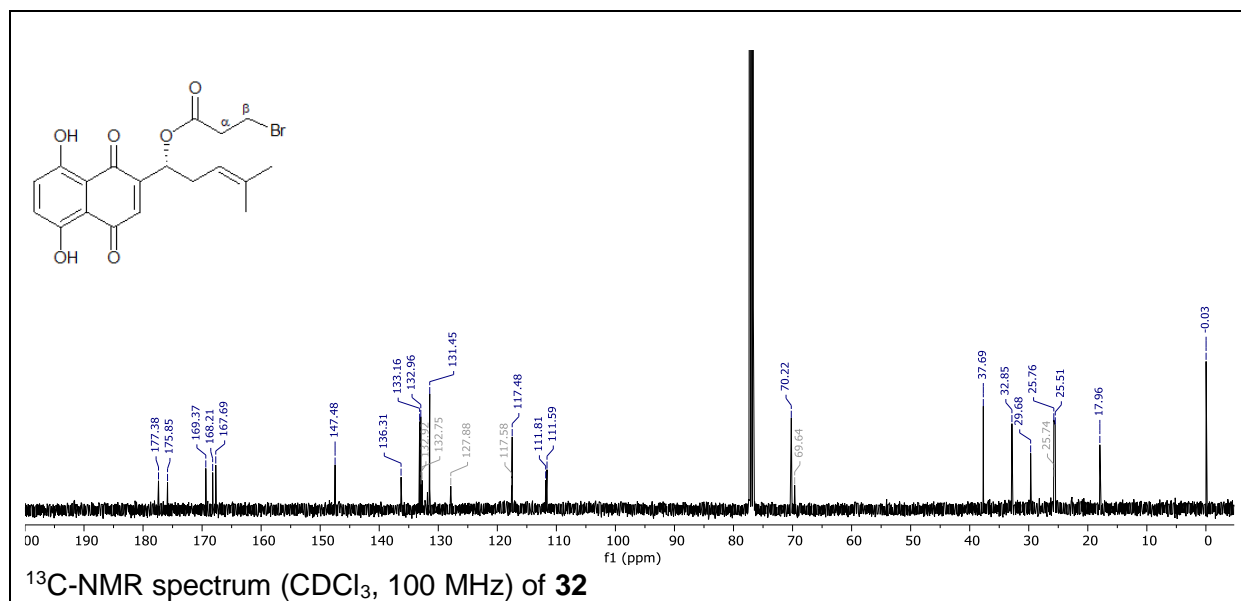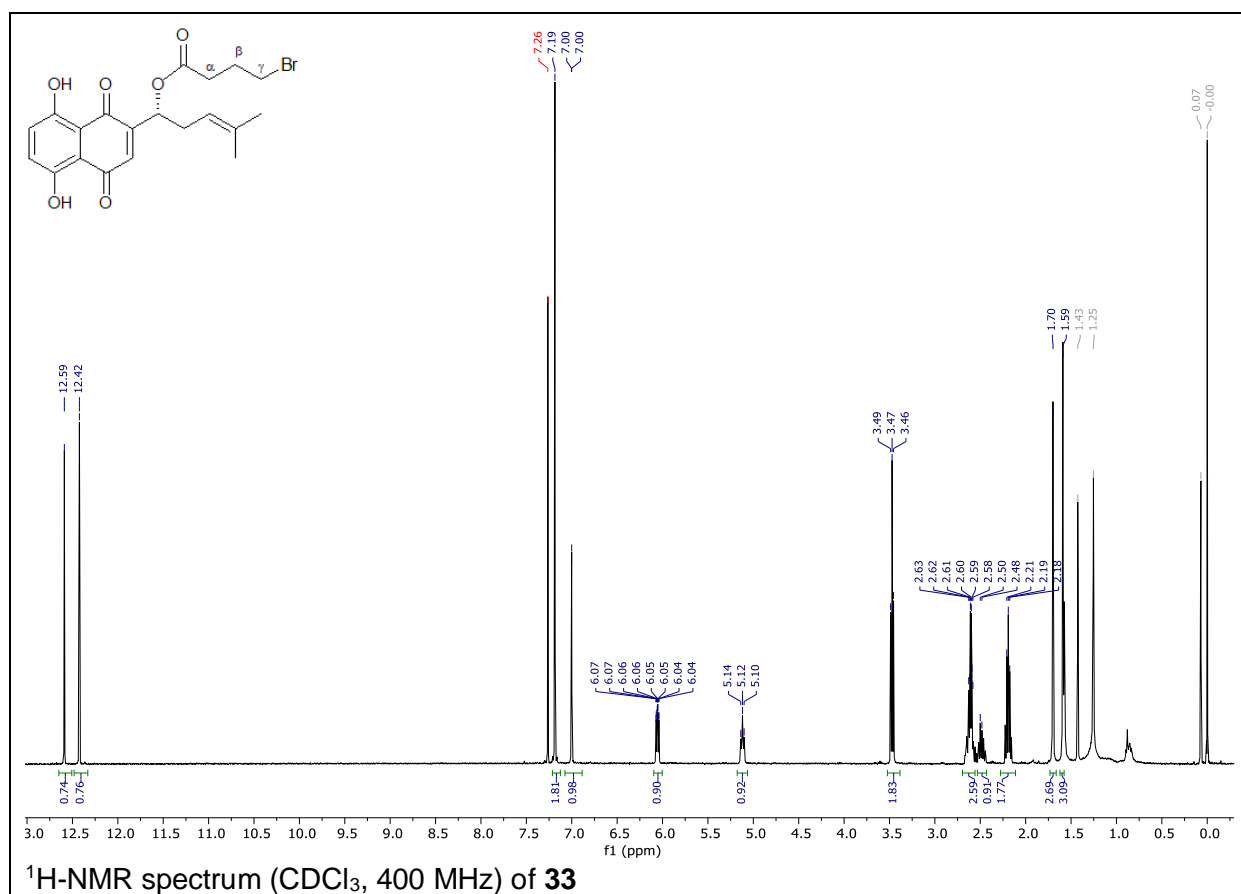

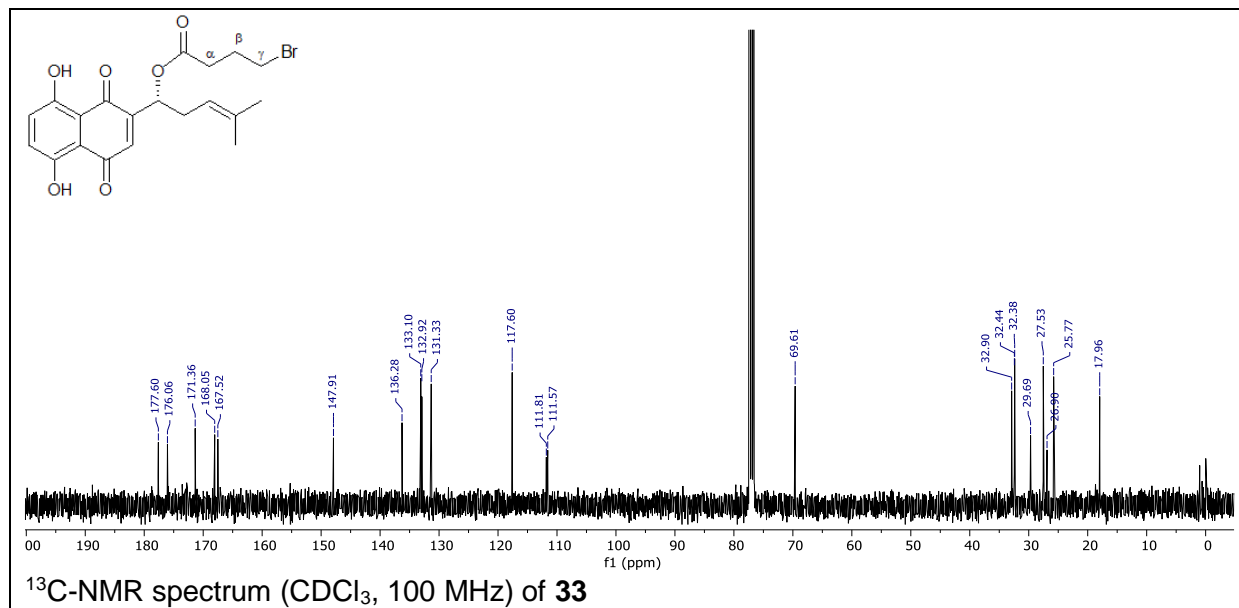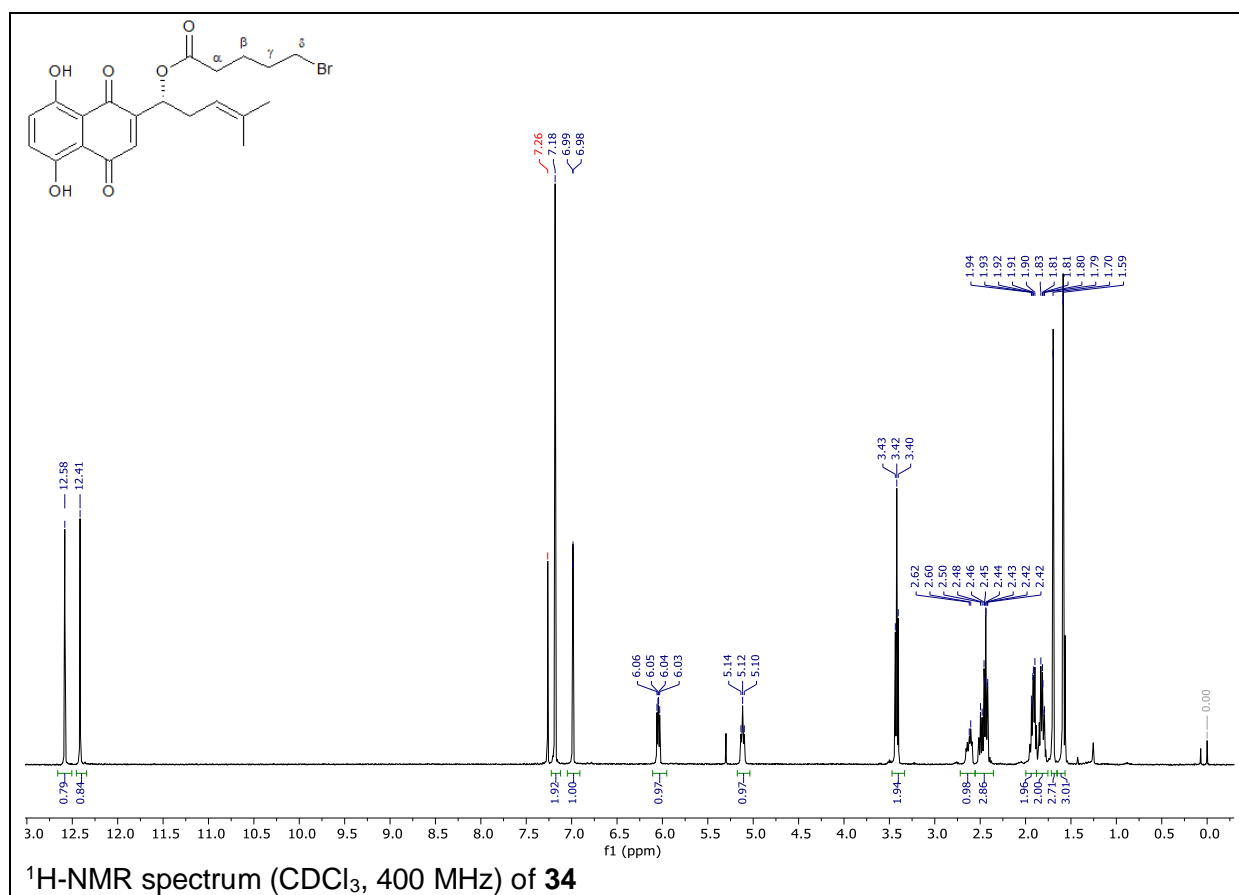



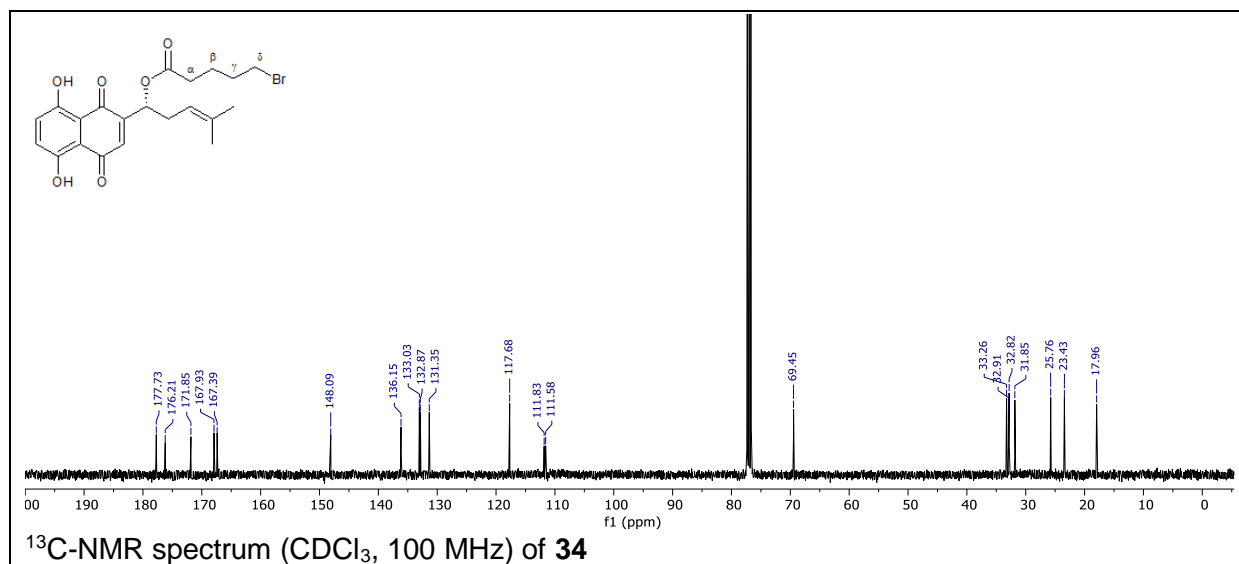

### 3. $^1\text{H}$ NMR spectra of precursor acids

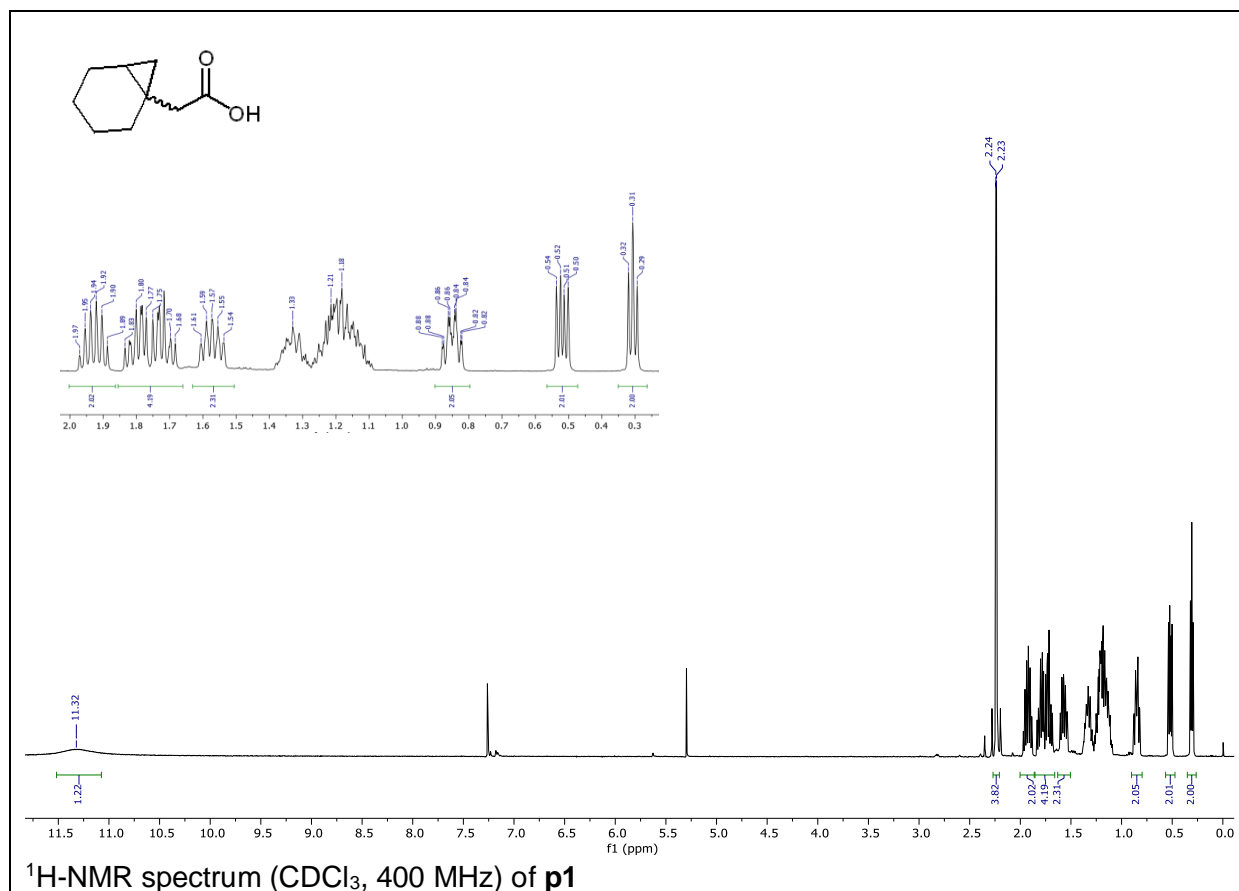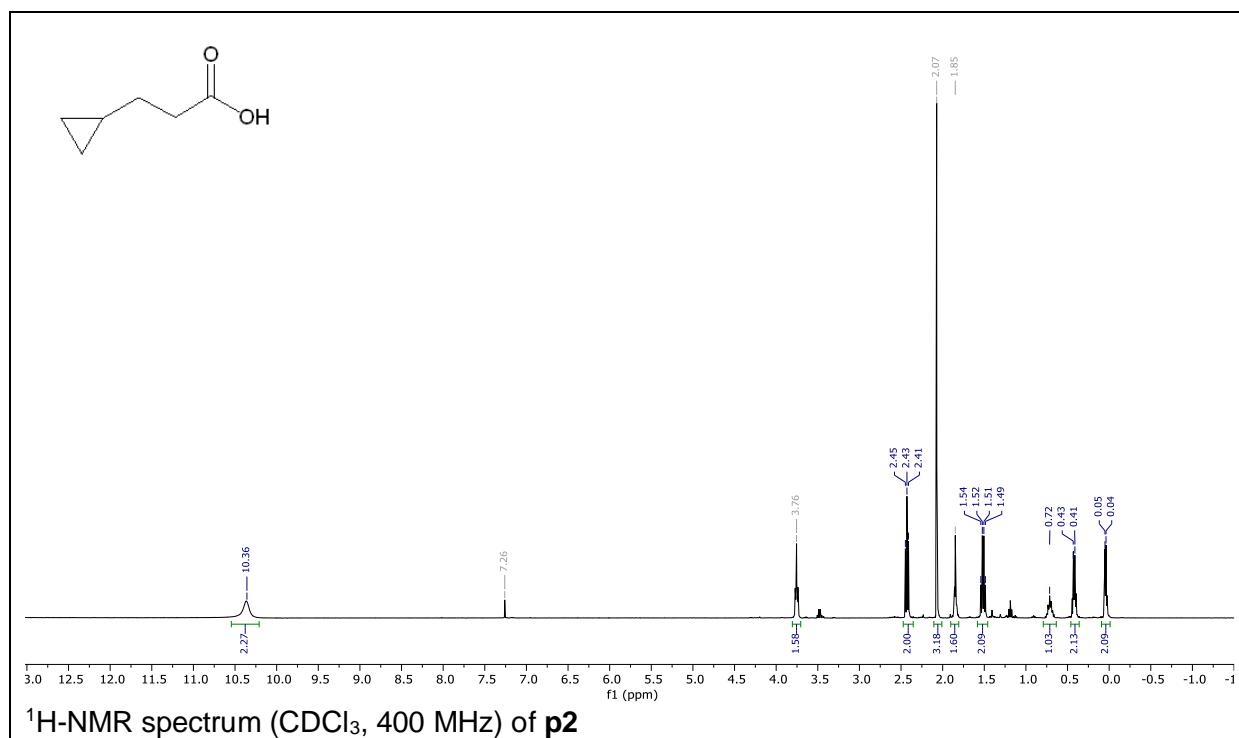

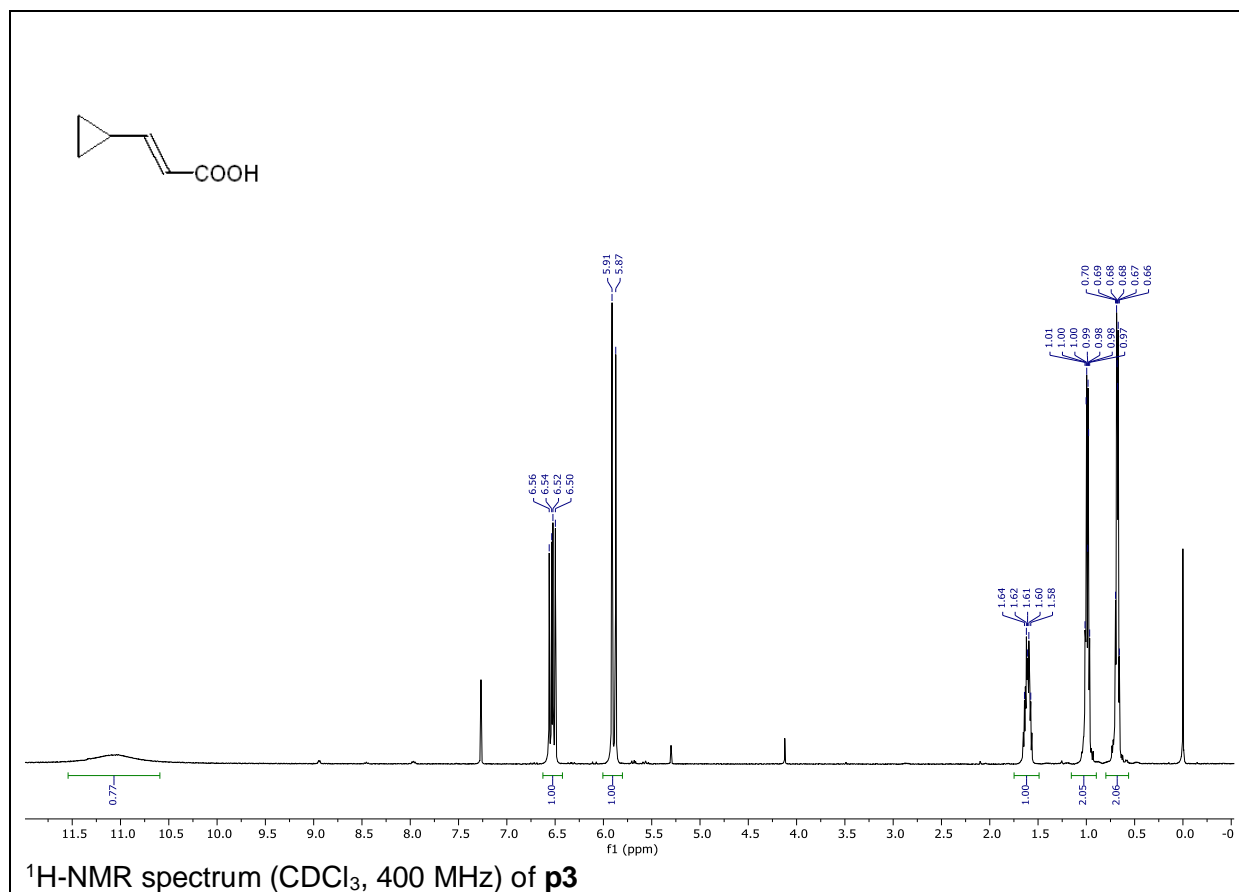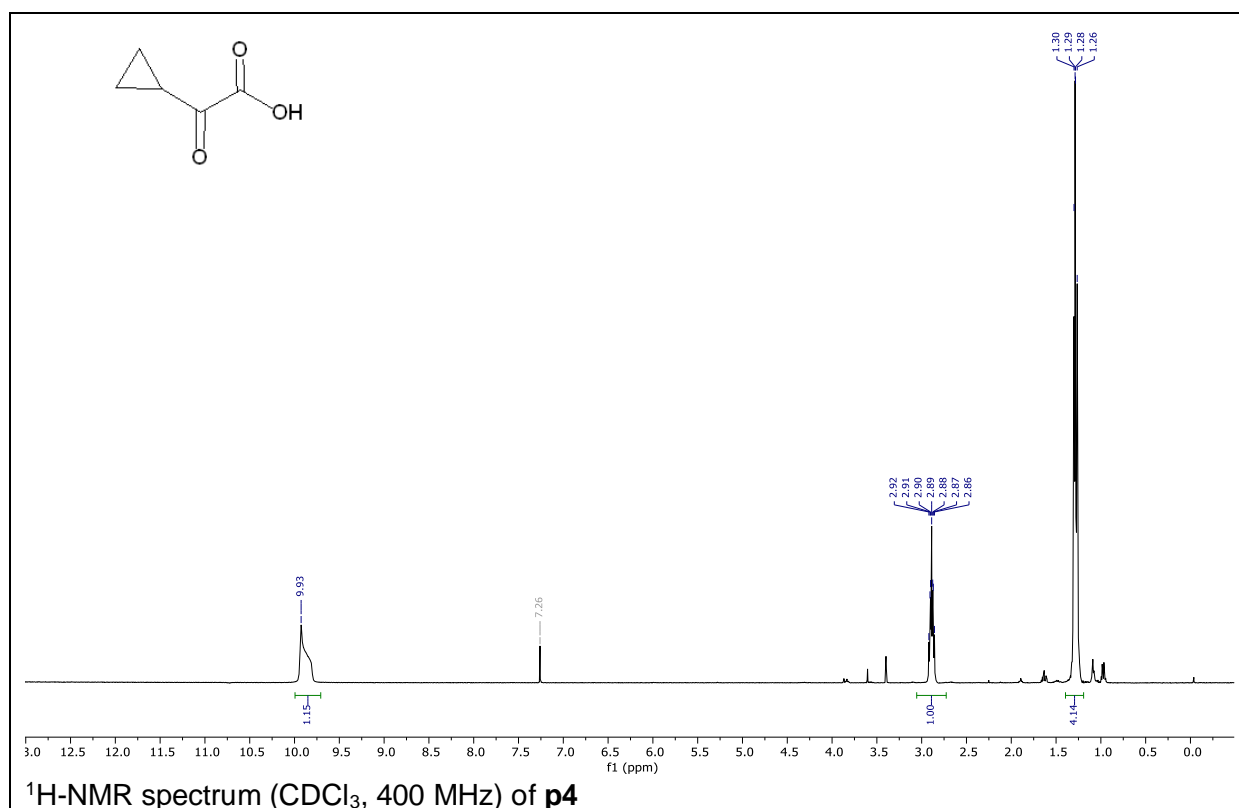

Supplement: ijms-22-02774-s001.pdf [file ijms-22-02774-s001.pdf]
